# Supplementary material
Source: PubMed Central journal article supplement (PMC7270886)
Supplement: jamapsychiatry-e201206-s001.pdf [file jamapsychiatry-e201206-s001.pdf]

## Supplementary Online Content

Zhou H, Rentsch CT, Zhongshan C, et al. Association of *OPRM1* functional coding variant with opioid use disorder: a genome-wide association study. *JAMA Psychiatry*. Published online June 3, 2020. doi:10.1001/jamapsychiatry.2020.1206

**eAppendix.** Methods

**eReferences**

**eFigure 1.** Manhattan and QQ Plots for OUD Meta-Analysis in MVP EAs (Without Yale-Penn or SAGE)

**eFigure 2.** Manhattan and QQ Plots for OUD in the Meta-Analysis of EAs Including All Cohorts

**eFigure 3.** Regional Manhattan Plot for the *OPRM1* Region Including rs1799971, and LD Matrix in 1000 Genome European Reference

**eFigure 4.** Manhattan and QQ Plots for OUD Meta-Analysis in MVP AAs (Without Yale-Penn)

**eFigure 5.** Manhattan and QQ Plots for OUD in the Meta-Analysis of AAs Including All Cohorts

**eFigure 6.** Manhattan and QQ Plots for OUD in the Trans-Population Meta-Analysis

**eTable 1.** *ICD-9/10* Codes for OUD in MVP

**eTable 2.** OUD Cases by Opioid Use Trajectory in MVP

**eTable 3.** Genetic Correlations Between OUD and 715 Traits Using LDSC

This supplementary material has been provided by the authors to give readers additional information about their work.

## **eAppendix. Methods**

**MVP Dataset Quality Control.** First, we removed subjects with mismatched genotypic and phenotypic sex and one subject randomly from each pair of related individuals (kinship coefficient  $\geq 0.0884^1$ ), leaving 107,438 phase2 subjects for subsequent analyses. Then we ran principal components analysis (PCA) on 74,827 common SNPs (MAF  $> 0.05$ ) shared by MVP and the 1000 Genomes phase 3 reference panels<sup>2</sup> using FastPCA.<sup>3</sup> Next, we clustered each participant into the nearest reference population according to the Euclidean distances between the participant and the centers of the 5 reference populations (African, admixed American, East Asian, European, and South Asian) using the first 10 PCs. A second PCA was performed for participants who were clustered with the European reference population (EUR), or who were clustered with the African reference population (AFR), and outliers were removed if any of the first 10 PCs were  $> 3$  standard deviations from the mean, leaving 67,268 European-American (EA) and 18,214 African-American (AA) unrelated subjects.

**MVP phase2 Imputation.** Imputation was performed with EAGLE2<sup>4</sup> and Minimac3<sup>5</sup> using 1000 Genomes Project phase 3 data<sup>2</sup> as the reference panel. Imputed genotypes with posterior probability  $\geq 0.9$  were transferred to best-guess genotypes (the rest were treated as missing genotype calls). A total of 5.1 M SNPs in EAs and 6.9 M in AAs with imputation INFO scores  $\geq 0.7$ , genotype call rates or best-guess rates  $> 0.95$ , Hardy-Weinberg Equilibrium p-value  $> 1 \times 10^{-6}$ , and minor allele frequency (MAF)  $> 0.01$  were retained for analysis.

**Yale-Penn and SAGE datasets.** To match the available diagnosis of MVP, the same EA datasets from Cheng et al.<sup>6</sup> were re-analyzed for OD status (case vs. control) using logistic regression in this study. AA and EA subjects from Yale-Penn in previously published studies<sup>7</sup>

and newly-genotyped samples were analyzed. All subjects were opioid exposed. Subjects with OD diagnosis information (either affected or not) were included. For EAs, Yale-Penn 1 contains 1,043 cases and 294 controls; Yale-Penn 2 contains 724 cases and 243 controls; Yale-Penn 3 contains 54 cases and 44 controls; SAGE contains 194 cases and 382 controls. For AAs, Yale-Penn 1 contains 831 cases and 573 controls and Yale-Penn 2 contains 349 cases and 274 controls. We used GEMMA<sup>8</sup> for association analyses taking relatedness into account, and correcting for age, sex, and the first 10 PCs.

**Gene-based association and gene-set analyses.** We performed gene-based association and gene-set analyses for OUD using MAGMA implemented in FUMA.<sup>9,10</sup> The summary data of the OUD meta-analysis was the input for FUMA. For each analysis, Bonferroni corrected p-value <0.05 was set as the significance threshold.

**18 correlated traits from published GWASs.** Those traits include ‘ever smoked regularly’, ‘current vs. former drinker’, ‘drinks per week’, and ‘age of initiation of smoking’ from GSCAN,<sup>11</sup> ‘N02A: Opioid’,<sup>12</sup> alcohol dependence from PGC,<sup>13</sup> AUDIT-P,<sup>14</sup> ADHD,<sup>15</sup> MDD,<sup>16</sup> schizophrenia,<sup>17</sup> neuroticism, depressed affect subcluster of neuroticism, and worry subcluster of neuroticism,<sup>18</sup> number of sexual partners and general risk tolerance,<sup>19</sup> insomnia,<sup>20</sup> educational attainment and cognitive performance,<sup>21</sup> and age of first birth.<sup>22</sup>

**Mendelian Randomization.** For instrumental variants missing in the OUD summary data, we used the results of the best proxy variant in highest LD ( $r^2 > 0.8$ ) with the missing variant. If the MAF of the missing variant was <0.01, or none of the variants within 200 kb had LD  $r^2 > 0.8$ , we removed the instrumental variant from the analysis. Palindromic SNPs (A/T or G/C alleles) with

MAF [0.4, 0.5] in the OUD summary data were also removed or replaced with the best proxy variant. For robust causal effect inference, we limited the traits studied to those with >30 available instruments. Accordingly, 12 exposures were analyzed. Multiple testing correction was applied for tested exposures and methods (significance threshold,  $0.05/36=1.39\times 10^{-3}$ ). There is only one available instrument in the current OUD study, so unidirectional MR from exposures to OUD was tested. We used weighted median,<sup>23</sup> inverse-variance weighted (IVW, random-effects model),<sup>24</sup> and MR-Egger,<sup>25</sup> implemented in the R package “MendelianRandomization v0.3.0”<sup>26</sup> for MR inference. Evidence of pleiotropic effects was examined by the MR-Egger intercept test, where a non-zero intercept ( $p<0.05$ ) indicates directional pleiotropy.<sup>25</sup> Whereas MR analyses require the beta (effect size) and standard error, we calculated these using Z-scores ( $z$ ), allele frequency ( $p$ ) and sample size ( $n$ ) from the OUD meta-analyses:<sup>27</sup>

$$\begin{aligned} \beta &= \frac{z}{\sqrt{2p(1-p)(n+z^2)}} \\ SE &= \frac{1}{\sqrt{2p(1-p)(n+z^2)}} \end{aligned}$$

## eReferences

1. Manichaikul A, Mychaleckyj JC, Rich SS, Daly K, Sale M, Chen WM. Robust relationship inference in genome-wide association studies. *Bioinformatics*. 2010;26(22):2867-2873.
2. 1000 Genomes Project Consortium, Auton A, Brooks LD, et al. A global reference for human genetic variation. *Nature*. 2015;526(7571):68-74.
3. Galinsky KJ, Bhatia G, Loh PR, et al. Fast Principal-Component Analysis Reveals Convergent Evolution of ADH1B in Europe and East Asia. *Am J Hum Genet*. 2016;98(3):456-472.
4. Loh PR, Danecek P, Palamara PF, et al. Reference-based phasing using the Haplotype Reference Consortium panel. *Nat Genet*. 2016;48(11):1443-1448.
5. Das S, Forer L, Schonherr S, et al. Next-generation genotype imputation service and methods. *Nat Genet*. 2016;48(10):1284-1287.
6. Cheng Z, Zhou H, Sherva R, Farrer LA, Kranzler HR, Gelernter J. Genome-wide Association Study Identifies a Regulatory Variant of RGMA Associated With Opioid Dependence in European Americans. *Biol Psychiatry*. 2018;84(10):762-770.
7. Gelernter J, Kranzler HR, Sherva R, et al. Genome-wide association study of opioid dependence: multiple associations mapped to calcium and potassium pathways. *Biol Psychiatry*. 2014;76(1):66-74.
8. Zhou X, Stephens M. Genome-wide efficient mixed-model analysis for association studies. *Nat Genet*. 2012;44(7):821-824.
9. de Leeuw CA, Mooij JM, Heskes T, Posthuma D. MAGMA: generalized gene-set analysis of GWAS data. *PLoS Comput Biol*. 2015;11(4):e1004219.
10. Watanabe K, Taskesen E, van Bochoven A, Posthuma D. Functional mapping and annotation of genetic associations with FUMA. *Nat Commun*. 2017;8(1):1826.
11. Liu M, Jiang Y, Wedow R, et al. Association studies of up to 1.2 million individuals yield new insights into the genetic etiology of tobacco and alcohol use. *Nat Genet*. 2019;51(2):237-244.
12. Wu Y, Byrne EM, Zheng Z, et al. Genome-wide association study of medication-use and associated disease in the UK Biobank. *Nat Commun*. 2019;10(1):1891.
13. Walters RK, Polimanti R, Johnson EC, et al. Transancestral GWAS of alcohol dependence reveals common genetic underpinnings with psychiatric disorders. *Nat Neurosci*. 2018;21(12):1656-1669.
14. Sanchez-Roige S, Palmer AA, Fontanillas P, et al. Genome-Wide Association Study Meta-Analysis of the Alcohol Use Disorders Identification Test (AUDIT) in Two Population-Based Cohorts. *Am J Psychiatry*. 2019;176(2):107-118.
15. Demontis D, Walters RK, Martin J, et al. Discovery of the first genome-wide significant risk loci for attention deficit/hyperactivity disorder. *Nat Genet*. 2019;51(1):63-75.
16. Howard DM, Adams MJ, Clarke TK, et al. Genome-wide meta-analysis of depression identifies 102 independent variants and highlights the importance of the prefrontal brain regions. *Nat Neurosci*. 2019;22(3):343-352.
17. Schizophrenia Working Group of the Psychiatric Genomics Consortium. Biological insights from 108 schizophrenia-associated genetic loci. *Nature*. 2014;511(7510):421-427.
18. Nagel M, Jansen PR, Stringer S, et al. Meta-analysis of genome-wide association studies for neuroticism in 449,484 individuals identifies novel genetic loci and pathways. *Nat Genet*. 2018;50(7):920-927.
19. Karlsson Linner R, Biroli P, Kong E, et al. Genome-wide association analyses of risk tolerance and risky behaviors in over 1 million individuals identify hundreds of loci and shared genetic influences. *Nat Genet*. 2019;51(2):245-257.

20. Jansen PR, Watanabe K, Stringer S, et al. Genome-wide analysis of insomnia in 1,331,010 individuals identifies new risk loci and functional pathways. *Nat Genet.* 2019;51(3):394-403.
21. Savage JE, Jansen PR, Stringer S, et al. Genome-wide association meta-analysis in 269,867 individuals identifies new genetic and functional links to intelligence. *Nat Genet.* 2018;50(7):912-919.
22. Barban N, Jansen R, de Vlaming R, et al. Genome-wide analysis identifies 12 loci influencing human reproductive behavior. *Nat Genet.* 2016;48(12):1462-1472.
23. Bowden J, Davey Smith G, Haycock PC, Burgess S. Consistent Estimation in Mendelian Randomization with Some Invalid Instruments Using a Weighted Median Estimator. *Genet Epidemiol.* 2016;40(4):304-314.
24. Bowden J, Del Greco MF, Minelli C, Davey Smith G, Sheehan N, Thompson J. A framework for the investigation of pleiotropy in two-sample summary data Mendelian randomization. *Stat Med.* 2017;36(11):1783-1802.
25. Bowden J, Davey Smith G, Burgess S. Mendelian randomization with invalid instruments: effect estimation and bias detection through Egger regression. *Int J Epidemiol.* 2015;44(2):512-525.
26. Yavorska OO, Burgess S. MendelianRandomization: an R package for performing Mendelian randomization analyses using summarized data. *Int J Epidemiol.* 2017;46(6):1734-1739.
27. Zhu Z, Zhang F, Hu H, et al. Integration of summary data from GWAS and eQTL studies predicts complex trait gene targets. *Nat Genet.* 2016;48(5):481-487.

**eFigure 1.** Manhattan and QQ Plots for OUD Meta-Analysis in MVP EAs (Without Yale-Penn or SAGE)

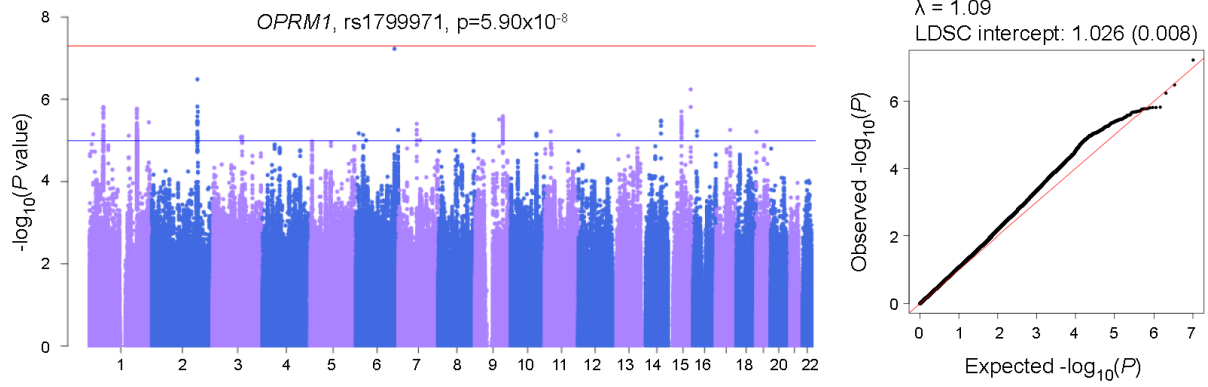

**eFigure 2.** Manhattan and QQ Plots for OUD in the Meta-Analysis of EAs Including All Cohorts

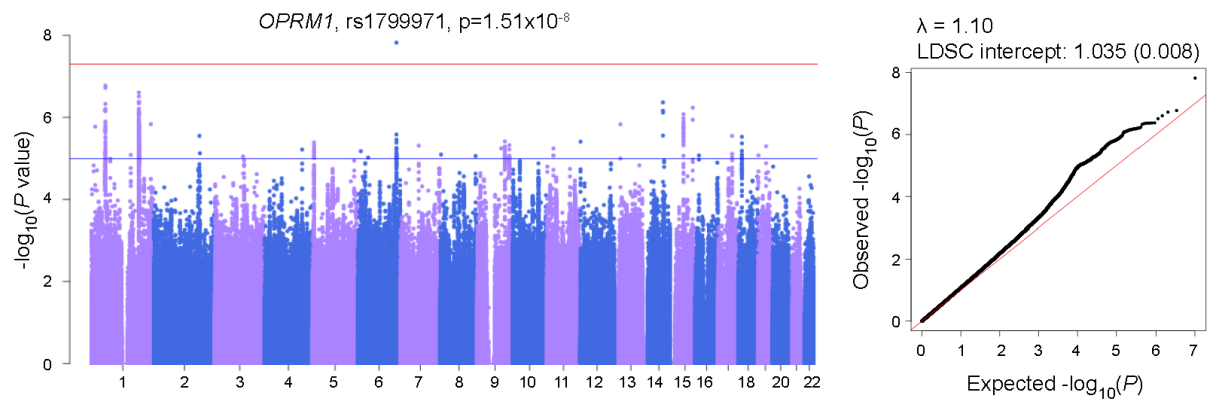



**eFigure 3.** Regional Manhattan Plot for the *OPRM1* Region Including rs1799971, and LD Matrix in 1000 Genome European Reference  
 Pair-wise LD was calculated for SNPs with  $p < 0.001$  within  $\pm 200\text{kb}$ . 131 SNPs are presented ranging 155.5kb. The yellow line links the position of rs1799971 in the three panels.

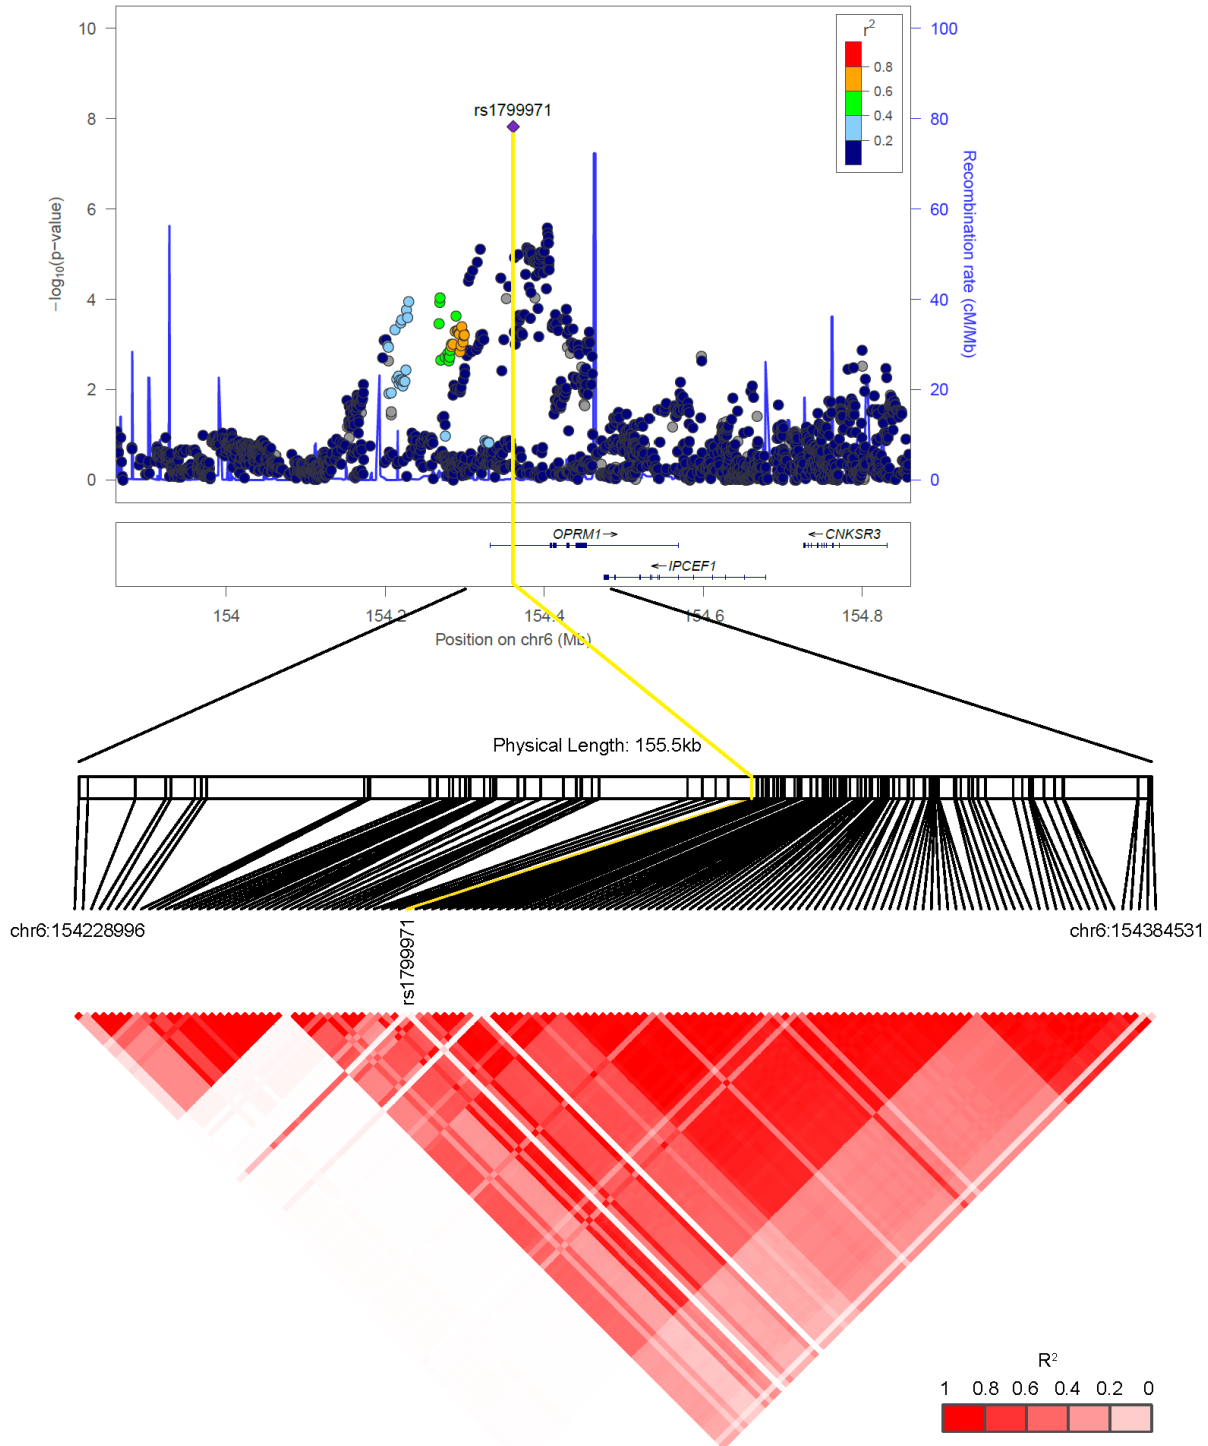

**eFigure 4.** Manhattan and QQ Plots for OUD Meta-Analysis in MVP AAs (Without Yale-Penn)

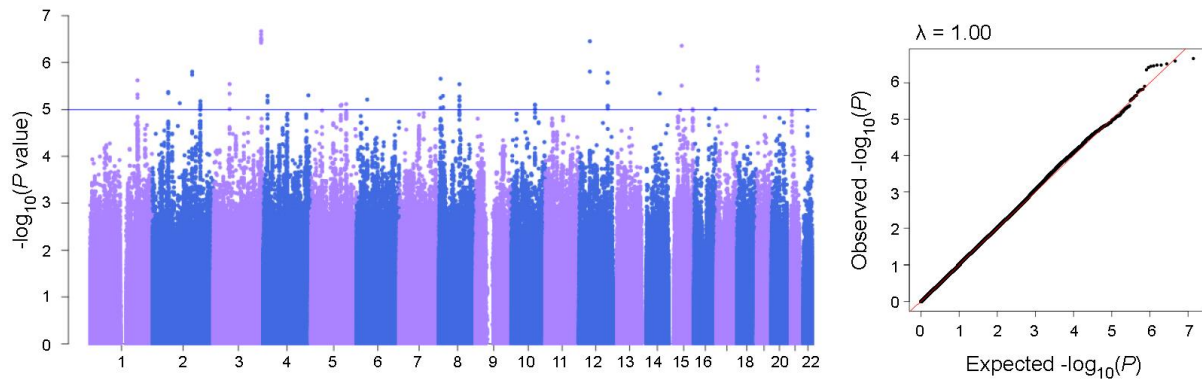

**eFigure 5.** Manhattan and QQ Plots for OUD in the Meta-Analysis of AAs Including All Cohorts

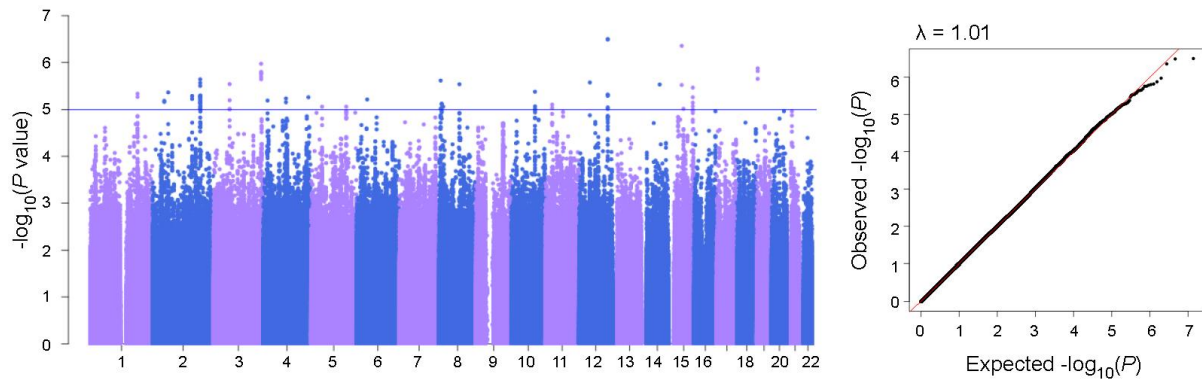

**eFigure 6.** Manhattan and QQ Plots for OUD in the Trans-Population Meta-Analysis

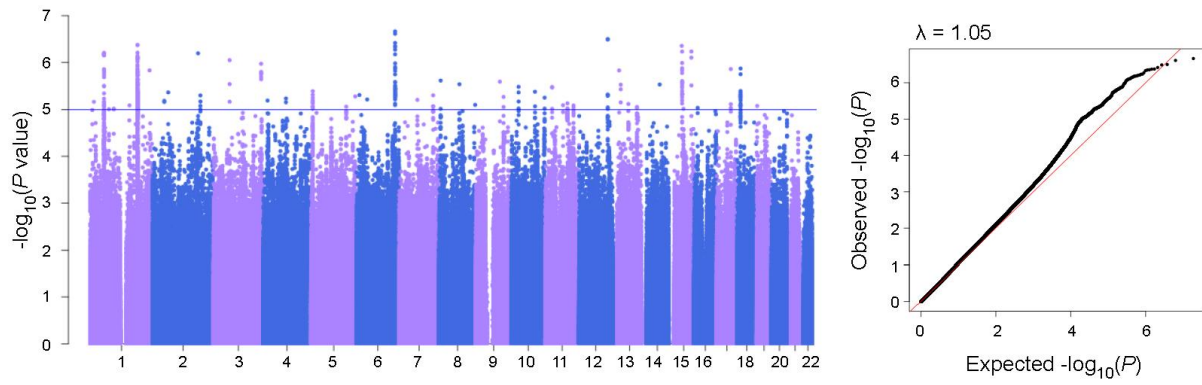

**eTable 1.** ICD-9/10 Codes for OUD in MVP

| Domain | Code    | Name                                                                          |
|--------|---------|-------------------------------------------------------------------------------|
| ICD-9  | 304.00  | Opioid type dependence, Unspecified                                           |
|        | 304.01  | Opioid type dependence, Continuous                                            |
|        | 304.02  | Opioid type dependence Episodic                                               |
|        | 304.03  | Opioid type dependence in remission                                           |
|        | 304.70  | Combinations of opioid type drug with any other drug dependence, unspecified  |
|        | 304.71  | Combinations of opioid type drug with any other drug dependence, continuous   |
|        | 304.72  | Combinations of opioid type drug with any other drug dependence, episodic use |
|        | 304.73  | Combinations of opioid type drug with any other drug dependence, in remission |
|        | 305.50  | Opioid abuse Unspecified                                                      |
|        | 305.51  | Opioid abuse Continuous                                                       |
|        | 305.52  | Opioid abuse Episodic                                                         |
|        | 305.53  | Opioid abuse in remission                                                     |
| ICD-10 | F11.10  | Opioid abuse uncomplicated                                                    |
|        | F11.11  | Opioid abuse in remission                                                     |
|        | F11.120 | Opioid abuse with intoxication uncomplicated                                  |
|        | F11.121 | Opioid abuse with intoxication delirium                                       |
|        | F11.122 | Opioid abuse with intoxication with perceptual disturbance                    |
|        | F11.129 | Opioid abuse with intoxication unspecified                                    |
|        | F11.14  | Opioid abuse with opioid-induced mood disorder                                |
|        | F11.150 | Opioid abuse with opioid-induced psychotic disorder with delusions            |
|        | F11.151 | Opioid abuse with opioid-induced psychotic disorder with hallucinations       |
|        | F11.159 | Opioid abuse with opioid-induced psychotic disorder unspecified               |
|        | F11.181 | Opioid abuse with opioid-induced sexual dysfunction                           |
|        | F11.182 | Opioid abuse with opioid-induced sleep disorder                               |
|        | F11.188 | Opioid abuse with other opioid-induced disorder                               |
|        | F11.19  | Opioid abuse with unspecified opioid-induced disorder                         |
|        | F11.20  | Opioid dependence uncomplicated                                               |
|        | F11.21  | Opioid dependence in remission                                                |
|        | F11.220 | Opioid dependence with intoxication uncomplicated                             |
|        | F11.221 | Opioid dependence with intoxication delirium                                  |
|        | F11.222 | Opioid dependence with intoxication with perceptual disturbance               |
|        | F11.229 | Opioid dependence with intoxication unspecified                               |
|        | F11.23  | Opioid dependence with withdrawal                                             |
|        | F11.24  | Opioid dependence with opioid-induced mood disorder                           |
|        | F11.250 | Opioid dependence with opioid-induced psychotic disorder with delusions       |
|        | F11.251 | Opioid dependence with opioid-induced psychotic disorder with hallucinations  |
|        | F11.259 | Opioid dependence with opioid-induced psychotic disorder unspecified          |
|        | F11.281 | Opioid dependence with opioid-induced sexual dysfunction                      |
|        | F11.282 | Opioid dependence with opioid-induced sleep disorder                          |
|        | F11.288 | Opioid dependence with other opioid-induced disorder                          |
|        | F11.29  | Opioid dependence with unspecified opioid-induced disorder                    |

**eTable 2.** OUD Cases by Opioid Use Trajectory in MVP

| <b>MEDD trajectory groups</b> | <b>Group 1</b> | <b>Group 2</b> | <b>Group 3</b> | <b>Group 4</b> |
|-------------------------------|----------------|----------------|----------------|----------------|
| EA                            |                |                |                |                |
| #subjects <sup>a</sup>        | 72,483         | 36,452         | 8,285          | 2,491          |
| #OUD (%) <sup>b</sup>         | 1,283 (1.77)   | 1,495 (4.10)   | 1,035 (12.5)   | 580 (23.3)     |
| AA                            |                |                |                |                |
| #subjects <sup>a</sup>        | 26,853         | 11,238         | 1,699          | 319            |
| #OUD (%) <sup>b</sup>         | 824 (3.1)      | 528 (4.70)     | 197 (11.6)     | 67 (21.0)      |

Note: <sup>a</sup>Subjects with OUD before baseline were excluded from trajectory analysis;  
<sup>b</sup>Subjects with OUD during follow up were all defined as cases for GWAS analysis.

**eTable 3.** Genetic Correlations Between OUD and 715 Traits Using LDSC  
 Traits labeled in bold are  $p_{\text{Bonferroni}} < 0.05$ .

| Trait2                                                                                                                             | PMID     | Category       | Ethnicity             | rg      | se     | p          |
|------------------------------------------------------------------------------------------------------------------------------------|----------|----------------|-----------------------|---------|--------|------------|
| <b>Ever smoked regularly</b>                                                                                                       | 30643251 | substance use  | European              | 0.4975  | 0.0556 | 3.37E-19   |
| <b>Maternal smoking around birth</b>                                                                                               | 0        | ukbb           | European              | 0.6797  | 0.0776 | 2.0569E-18 |
| <b>Age completed full time education</b>                                                                                           | 0        | ukbb           | European              | -0.5085 | 0.0623 | 3.1703E-16 |
| <b>Qualifications: A levels/AS levels or equivalent</b>                                                                            | 0        | ukbb           | European              | -0.4714 | 0.0596 | 2.6778E-15 |
| <b>Qualifications: None of the above</b>                                                                                           | 0        | ukbb           | European              | 0.4452  | 0.0582 | 2.1099E-14 |
| <b>Drinks per week</b>                                                                                                             | 30643251 | substance use  | European              | 0.3836  | 0.0503 | 2.43E-14   |
| <b>Past tobacco smoking - less smoked</b>                                                                                          | 0        | ukbb           | European              | -0.4132 | 0.055  | 5.6473E-14 |
| <b>Educational attainment</b>                                                                                                      | 30038396 | cognitive      | European              | -0.3742 | 0.05   | 7.20E-14   |
| <b>Alcohol usually taken with meals</b>                                                                                            | 0        | ukbb           | European              | -0.4635 | 0.0628 | 1.5509E-13 |
| <b>Qualifications: College or University degree</b>                                                                                | 0        | ukbb           | European              | -0.3685 | 0.0532 | 4.1808E-12 |
| <b>Qualifications: O levels/GCSEs or equivalent</b>                                                                                | 0        | ukbb           | European              | -0.449  | 0.0652 | 5.5469E-12 |
| <b>Exposure to tobacco smoke at home</b>                                                                                           | 0        | ukbb           | European              | 0.7198  | 0.1052 | 7.8857E-12 |
| <b>N02A: Opioids</b>                                                                                                               | 31015401 | substance use  | European              | 0.4819  | 0.0715 | 1.61E-11   |
| <b>Number of sexual partners</b>                                                                                                   | 30643258 | risk behaviour | European              | 0.3612  | 0.0537 | 1.81E-11   |
| <b>Seen a psychiatrist for nerves_ anxiety_ tension or depression</b>                                                              | 0        | ukbb           | European              | 0.5019  | 0.0747 | 1.8909E-11 |
| <b>MDD</b>                                                                                                                         | 30718901 | psychiatric    | European              | 0.3521  | 0.0551 | 1.62E-10   |
| <b>Overall health rating - poorer rating</b>                                                                                       | 0        | ukbb           | European              | 0.3571  | 0.0566 | 2.7505E-10 |
| <b>Cognitive performance</b>                                                                                                       | 30038396 | cognitive      | European              | -0.3086 | 0.0503 | 8.61E-10   |
| <b>Tense / highly strung</b>                                                                                                       | 0        | ukbb           | European              | 0.3986  | 0.0652 | 9.5507E-10 |
| <b>Townsend deprivation index at recruitment</b>                                                                                   | 0        | ukbb           | European              | 0.4812  | 0.0787 | 9.6454E-10 |
| <b>Current employment status: Unable to work because of sickness or disability</b>                                                 | 0        | ukbb           | European              | 0.5614  | 0.0939 | 2.2132E-09 |
| <b>Pain type(s) experienced in last month: Back pain</b>                                                                           | 0        | ukbb           | European              | 0.4462  | 0.0747 | 2.33E-09   |
| <b>Average weekly beer plus cider intake</b>                                                                                       | 0        | ukbb           | European              | 0.3938  | 0.0681 | 7.2646E-09 |
| <b>Medication for pain relief_ constipation_ heartburn: None of the above</b>                                                      | 0        | ukbb           | European              | -0.3627 | 0.0633 | 1.0258E-08 |
| <b>Types of physical activity in last 4 weeks: Heavy DIY (eg: weeding_ lawn mowing_ carpentry_ digging)</b>                        | 0        | ukbb           | European              | -0.4109 | 0.073  | 1.8393E-08 |
| <b>Schizophrenia</b>                                                                                                               | 25056061 | psychiatric    | European & East Asian | 0.291   | 0.0518 | 1.9273E-08 |
| <b>Seen doctor (GP) for nerves_ anxiety_ tension or depression</b>                                                                 | 0        | ukbb           | European              | 0.3534  | 0.0633 | 2.3186E-08 |
| <b>Pain type(s) experienced in last month: None of the above</b>                                                                   | 0        | ukbb           | European              | -0.3903 | 0.0705 | 3.1101E-08 |
| <b>Neuroticism</b>                                                                                                                 | 29942085 | psychiatric    | European              | 0.2748  | 0.0513 | 8.65E-08   |
| <b>Taking other prescription medications</b>                                                                                       | 0        | ukbb           | European              | 0.3529  | 0.0661 | 9.5303E-08 |
| <b>Age of first birth</b>                                                                                                          | 27798627 | reproductive   | European              | -0.3855 | 0.0729 | 1.2541E-07 |
| <b>Medication for pain relief_ constipation_ heartburn: Paracetamol</b>                                                            | 0        | ukbb           | European              | 0.373   | 0.0708 | 1.3869E-07 |
| <b>Wheeze or whistling in the chest in last year</b>                                                                               | 0        | ukbb           | European              | 0.3448  | 0.0658 | 1.5793E-07 |
| <b>Blood clot_ DVT_ bronchitis_ emphysema_ asthma_ rhinitis_ eczema_ allergy diagnosed by doctor: Emphysema/chronic bronchitis</b> | 0        | ukbb           | European              | 0.5332  | 0.102  | 1.7093E-07 |
| <b>Mood swings</b>                                                                                                                 | 0        | ukbb           | European              | 0.3227  | 0.0619 | 1.8768E-07 |
| <b>Types of physical activity in last 4 weeks: Light DIY (eg: pruning_ watering the lawn)</b>                                      | 0        | ukbb           | European              | -0.3754 | 0.0722 | 1.9664E-07 |
| <b>Depressed affect subcluster</b>                                                                                                 | 29942085 | psychiatric    | European              | 0.2673  | 0.0518 | 2.47E-07   |
| <b>Exposure to tobacco smoke outside home</b>                                                                                      | 0        | ukbb           | European              | 0.4325  | 0.084  | 2.5957E-07 |
| <b>PGC-Alcohol dependence</b>                                                                                                      | 30482948 | substance use  | European              | 0.7335  | 0.1425 | 2.65E-07   |
| <b>Age of initiation of smoking</b>                                                                                                | 30643251 | substance use  | European              | -0.3525 | 0.0686 | 2.78E-07   |
| <b>Frequency of depressed mood in last 2 weeks</b>                                                                                 | 0        | ukbb           | European              | 0.3777  | 0.0736 | 2.8555E-07 |
| <b>Qualifications: Other professional qualifications eg: nursing_ teaching</b>                                                     | 0        | ukbb           | European              | -0.3489 | 0.0695 | 5.1998E-07 |

|                                                                                         |          |                |          |         |        |             |
|-----------------------------------------------------------------------------------------|----------|----------------|----------|---------|--------|-------------|
| Number of incorrect matches in round                                                    | 0        | ukbb           | European | 0.3267  | 0.0654 | 5.9481E-07  |
| Frequency of tenseness / restlessness in last 2 weeks                                   | 0        | ukbb           | European | 0.331   | 0.0666 | 6.6551E-07  |
| Light smokers_ at least 100 smokes in lifetime                                          | 0        | ukbb           | European | 0.4251  | 0.0856 | 6.7726E-07  |
| ADHD                                                                                    | 30478444 | psychiatric    | European | 0.3566  | 0.0718 | 6.78E-07    |
| Mouth/teeth dental problems: None of the above                                          | 0        | ukbb           | European | -0.3707 | 0.0749 | 7.3639E-07  |
| Job involves heavy manual or physical work                                              | 0        | ukbb           | European | 0.329   | 0.0667 | 8.2765E-07  |
| Job involves mainly walking or standing                                                 | 0        | ukbb           | European | 0.3207  | 0.0653 | 8.9916E-07  |
| Medication for pain relief_ constipation_ heartburn: Laxatives (e.g. Dulcolax_ Senokot) | 0        | ukbb           | European | 0.5513  | 0.1123 | 9.135E-07   |
| Mouth/teeth dental problems: Dentures                                                   | 0        | ukbb           | European | 0.3445  | 0.0705 | 1.0173E-06  |
| Number of treatments/medications taken                                                  | 0        | ukbb           | European | 0.2949  | 0.0605 | 1.1085E-06  |
| Frequency of unenthusiasm / disinterest in last 2 weeks                                 | 0        | ukbb           | European | 0.3499  | 0.0718 | 1.1097E-06  |
| Smoking/smokers in household                                                            | 0        | ukbb           | European | 0.7133  | 0.1465 | 1.1278E-06  |
| Ever had hysterectomy (womb removed)                                                    | 0        | ukbb           | European | 0.6415  | 0.1327 | 1.3312E-06  |
| Frequency of tiredness / lethargy in last 2 weeks                                       | 0        | ukbb           | European | 0.3175  | 0.0667 | 1.9011E-06  |
| Risk taking                                                                             | 0        | ukbb           | European | 0.2843  | 0.06   | 2.1819E-06  |
| Diagnoses - main ICD10: M54 Dorsalgia                                                   | 0        | ukbb           | European | 0.5985  | 0.1265 | 2.2525E-06  |
| Noisy workplace                                                                         | 0        | ukbb           | European | 0.3727  | 0.079  | 0.000002371 |
| Pain type(s) experienced in last month: Neck or shoulder pain                           | 0        | ukbb           | European | 0.3419  | 0.0725 | 2.4133E-06  |
| Medication for pain relief_ constipation_ heartburn: Omeprazole (e.g. Zanol)            | 0        | ukbb           | European | 0.4232  | 0.0899 | 2.4745E-06  |
| Current vs former smoker                                                                | 30643251 | substance use  | European | 0.3918  | 0.0844 | 3.40E-06    |
| Fed-up feelings                                                                         | 0        | ukbb           | European | 0.2834  | 0.0612 | 0.000003627 |
| Ever used hormone-replacement therapy (HRT)                                             | 0        | ukbb           | European | 0.3942  | 0.086  | 4.6246E-06  |
| Age started oral contraceptive pill                                                     | 0        | ukbb           | European | -0.3981 | 0.0871 | 4.8321E-06  |
| Pain type(s) experienced in last month: Stomach or abdominal pain                       | 0        | ukbb           | European | 0.397   | 0.0883 | 6.8597E-06  |
| Time spent using computer                                                               | 0        | ukbb           | European | -0.2578 | 0.0575 | 7.2478E-06  |
| Duration walking for pleasure                                                           | 0        | ukbb           | European | -0.4    | 0.0902 | 9.2916E-06  |
| Miserableness                                                                           | 0        | ukbb           | European | 0.2761  | 0.0626 | 0.000010416 |
| Illnesses of mother: Chronic bronchitis/emphysema                                       | 0        | ukbb           | European | 0.6303  | 0.1436 | 0.000011336 |
| Prospective memory result - second attempt                                              | 0        | ukbb           | European | 0.4478  | 0.1029 | 0.000013391 |
| Insomnia                                                                                | 30804565 | sleeping       | European | 0.2567  | 0.0591 | 1.41E-05    |
| Types of transport used (excluding work): Walk                                          | 0        | ukbb           | European | -0.2971 | 0.0686 | 0.000015056 |
| Age at last live birth                                                                  | 0        | ukbb           | European | -0.3132 | 0.0732 | 0.00001898  |
| Health satisfaction -unhappy                                                            | 0        | ukbb           | European | 0.3112  | 0.0741 | 0.000026397 |
| Usual walking pace                                                                      | 0        | ukbb           | European | -0.2416 | 0.058  | 0.000030754 |
| Illnesses of father: Lung cancer                                                        | 0        | ukbb           | European | 0.4832  | 0.1163 | 0.000032783 |
| Sensitivity / hurt feelings                                                             | 0        | ukbb           | European | 0.2514  | 0.061  | 0.000037743 |
| Worry subcluster                                                                        | 29942085 | psychiatric    | European | 0.2393  | 0.0583 | 4.10E-05    |
| General risk tolerance                                                                  | 30643258 | risk behaviour | European | 0.2305  | 0.0563 | 4.18E-05    |
| AUDIT-P                                                                                 | 30336701 | substance use  | European | 0.3404  | 0.0838 | 4.84E-05    |
| Ever unenthusiastic/disinterested for a whole week                                      | 0        | ukbb           | European | 0.3761  | 0.0926 | 0.000048757 |
| Number of self-reported non-cancer illnesses                                            | 0        | ukbb           | European | 0.2153  | 0.0536 | 0.000058778 |
| Number of full sisters                                                                  | 0        | ukbb           | European | 0.3749  | 0.0944 | 0.000071949 |
| Pain type(s) experienced in last month: Hip                                             | 0        | ukbb           | European | 0.3549  | 0.0895 | 0.00007349  |



|                                                                                                               |          |               |          |         |        |             |
|---------------------------------------------------------------------------------------------------------------|----------|---------------|----------|---------|--------|-------------|
| pain                                                                                                          |          |               |          |         |        | 3           |
| Chest pain or discomfort walking normally                                                                     | 0        | ukbb          | European | 0.4479  | 0.1148 | 0.000095773 |
| Illness_injury_bereavement_stress in last 2 years: Financial difficulties                                     | 0        | ukbb          | European | 0.2904  | 0.0746 | 0.000099488 |
| Forced expiratory volume in 1-second (FEV1)_ predicted percentage                                             | 0        | ukbb          | European | -0.219  | 0.0571 | 0.0001      |
| Guilty feelings                                                                                               | 0        | ukbb          | European | 0.2519  | 0.0656 | 0.0001      |
| Non-cancer illness code_ self-reported: emphysema/chronic bronchitis                                          | 0        | ukbb          | European | 0.4098  | 0.1057 | 0.0001      |
| Number of live births                                                                                         | 0        | ukbb          | European | 0.3015  | 0.0786 | 0.0001      |
| Job involves shift work                                                                                       | 0        | ukbb          | European | 0.35    | 0.0955 | 0.0002      |
| Time spent watching television (TV)                                                                           | 0        | ukbb          | European | 0.1964  | 0.0531 | 0.0002      |
| Why stopped smoking: None of the above                                                                        | 0        | ukbb          | European | -0.4202 | 0.1134 | 0.0002      |
| Adopted as a child                                                                                            | 0        | ukbb          | European | 0.522   | 0.1441 | 0.0003      |
| Illnesses of father: None of the above (group 2)                                                              | 0        | ukbb          | European | -0.4439 | 0.1226 | 0.0003      |
| Average weekly fortified wine intake                                                                          | 0        | ukbb          | European | -0.5485 | 0.1545 | 0.0004      |
| Frequency of walking for pleasure in last 4 weeks                                                             | 0        | ukbb          | European | 0.2795  | 0.0803 | 0.0005      |
| Long-standing illness_ disability or infirmity                                                                | 0        | ukbb          | European | 0.2009  | 0.0575 | 0.0005      |
| Medication for cholesterol_ blood pressure_ diabetes_ or take exogenous hormones: Hormone replacement therapy | 0        | ukbb          | European | 0.4168  | 0.119  | 0.0005      |
| Types of physical activity in last 4 weeks: Walking for pleasure (not as a means of transport)                | 0        | ukbb          | European | -0.2204 | 0.0634 | 0.0005      |
| Worrier / anxious feelings                                                                                    | 0        | ukbb          | European | 0.2028  | 0.0579 | 0.0005      |
| Diagnoses - main ICD10: R10 Abdominal and pelvic pain                                                         | 0        | ukbb          | European | 0.3761  | 0.1095 | 0.0006      |
| Non-cancer illness code_ self-reported: gastro-oesophageal reflux (gord) / gastric reflux                     | 0        | ukbb          | European | 0.4233  | 0.1234 | 0.0006      |
| Depressive symptoms                                                                                           | 27089181 | psychiatric   | European | 0.2758  | 0.0818 | 0.0007      |
| Average weekly red wine intake                                                                                | 0        | ukbb          | European | -0.2449 | 0.0726 | 0.0007      |
| Impedance of leg (left)                                                                                       | 0        | ukbb          | European | 0.1392  | 0.0415 | 0.0008      |
| Types of physical activity in last 4 weeks: Other exercises (eg: swimming_ cycling_ keep fit_ bowling)        | 0        | ukbb          | European | -0.2321 | 0.0695 | 0.0008      |
| Ever depressed for a whole week                                                                               | 0        | ukbb          | European | 0.2829  | 0.0853 | 0.0009      |
| Irritability                                                                                                  | 0        | ukbb          | European | 0.1975  | 0.0595 | 0.0009      |
| Number of unsuccessful stop-smoking attempts                                                                  | 0        | ukbb          | European | 0.3933  | 0.1183 | 0.0009      |
| Nap during day                                                                                                | 0        | ukbb          | European | 0.1759  | 0.0535 | 0.001       |
| Suffer from nerves                                                                                            | 0        | ukbb          | European | 0.2256  | 0.0693 | 0.0011      |
| Diagnoses - main ICD10: K29 Gastritis and duodenitis                                                          | 0        | ukbb          | European | 0.4354  | 0.1363 | 0.0014      |
| Pain type(s) experienced in last month: Pain all over the body                                                | 0        | ukbb          | European | 0.3717  | 0.1172 | 0.0015      |
| Peak expiratory flow (PEF)                                                                                    | 0        | ukbb          | European | -0.1856 | 0.0585 | 0.0015      |
| Current employment status: Doing unpaid or voluntary work                                                     | 0        | ukbb          | European | -0.4123 | 0.1303 | 0.0016      |
| Pain type(s) experienced in last month: Headache                                                              | 0        | ukbb          | European | 0.2271  | 0.0718 | 0.0016      |
| Wears glasses or contact lenses                                                                               | 0        | ukbb          | European | -0.3256 | 0.1031 | 0.0016      |
| Cigarettes per day                                                                                            | 30643251 | substance use | European | 0.267   | 0.0849 | 0.0017      |
| Illnesses of father: Chronic bronchitis/emphysema                                                             | 0        | ukbb          | European | 0.3339  | 0.1072 | 0.0018      |
| Impedance of leg (right)                                                                                      | 0        | ukbb          | European | 0.1328  | 0.0424 | 0.0018      |
| Breastfed as a baby                                                                                           | 0        | ukbb          | European | -0.3292 | 0.1058 | 0.0019      |
| Ever had stillbirth_ spontaneous miscarriage or termination                                                   | 0        | ukbb          | European | 0.3296  | 0.1077 | 0.0022      |
| AUDIT                                                                                                         | 30336701 | substance use | European | 0.1946  | 0.0639 | 0.0023      |
| Types of physical activity in last 4 weeks: None of the above                                                 | 0        | ukbb          | European | 0.261   | 0.0855 | 0.0023      |
| Lung cancer                                                                                                   | 27488534 | cancer        | European | 0.4359  | 0.1443 | 0.0025      |
| Non-cancer illness code_ self-reported: gout                                                                  | 0        | ukbb          | European | 0.232   | 0.0773 | 0.0027      |

|                                                                                                                                              |          |                |          |         |        |        |
|----------------------------------------------------------------------------------------------------------------------------------------------|----------|----------------|----------|---------|--------|--------|
| Number of days/week walked 10+ minutes                                                                                                       | 0        | ukbb           | European | 0.1701  | 0.0571 | 0.0029 |
| Diagnoses - main ICD10: K62 Other diseases of anus and rectum                                                                                | 0        | ukbb           | European | 0.5499  | 0.1862 | 0.0031 |
| Number of operations_self-reported                                                                                                           | 0        | ukbb           | European | 0.193   | 0.0655 | 0.0032 |
| Diagnoses - main ICD10: K57 Diverticular disease of intestine                                                                                | 0        | ukbb           | European | 0.3173  | 0.1078 | 0.0033 |
| Mothers age at death                                                                                                                         | 27015805 | aging          | European | -0.3488 | 0.1191 | 0.0034 |
| Diagnoses - main ICD10: I83 Varicose veins of lower extremities                                                                              | 0        | ukbb           | European | 0.2695  | 0.0922 | 0.0035 |
| Illnesses of father: Heart disease                                                                                                           | 0        | ukbb           | European | -0.2211 | 0.0764 | 0.0038 |
| Neck/shoulder pain for 3+ months                                                                                                             | 0        | ukbb           | European | 0.5796  | 0.201  | 0.0039 |
| Diagnoses - main ICD10: R07 Pain in throat and chest                                                                                         | 0        | ukbb           | European | 0.2636  | 0.0915 | 0.004  |
| Illness_injury_bereavement_stress in last 2 years: Serious illness_injury or assault to yourself                                             | 0        | ukbb           | European | 0.3417  | 0.1187 | 0.004  |
| Loud music exposure frequency                                                                                                                | 0        | ukbb           | European | 0.3611  | 0.1259 | 0.0041 |
| Types of transport used (excluding work): Car/motor vehicle                                                                                  | 0        | ukbb           | European | -0.2589 | 0.0903 | 0.0041 |
| Qualifications: CSEs or equivalent                                                                                                           | 0        | ukbb           | European | 0.2594  | 0.0907 | 0.0042 |
| Ever highly irritable/argumentative for 2 days                                                                                               | 0        | ukbb           | European | 0.2398  | 0.0839 | 0.0043 |
| Diagnoses - main ICD10: K21 Gastro-oesophageal reflux disease                                                                                | 0        | ukbb           | European | 0.4291  | 0.1513 | 0.0046 |
| Transport type for commuting to job workplace: Walk                                                                                          | 0        | ukbb           | European | -0.2981 | 0.1061 | 0.005  |
| Parents age at death                                                                                                                         | 27015805 | aging          | European | -0.3796 | 0.1356 | 0.0051 |
| Why stopped smoking: Health precaution                                                                                                       | 0        | ukbb           | European | 0.284   | 0.1014 | 0.0051 |
| Bipolar disorder                                                                                                                             | 31043756 | psychiatric    | European | 0.1647  | 0.059  | 0.0052 |
| Non-cancer illness code_self-reported: anxiety/panic attacks                                                                                 | 0        | ukbb           | European | 0.4288  | 0.1552 | 0.0057 |
| Number of days/week of moderate physical activity 10+ minutes                                                                                | 0        | ukbb           | European | 0.1935  | 0.0704 | 0.006  |
| Forced expiratory volume in 1-second (FEV1)_ Best measure                                                                                    | 0        | ukbb           | European | -0.1471 | 0.0537 | 0.0062 |
| Time from waking to first cigarette                                                                                                          | 0        | ukbb           | European | -0.496  | 0.181  | 0.0062 |
| Chest pain or discomfort                                                                                                                     | 0        | ukbb           | European | 0.1965  | 0.0721 | 0.0064 |
| Illnesses of siblings: None of the above (group 1)                                                                                           | 0        | ukbb           | European | -0.228  | 0.0837 | 0.0065 |
| Financial situation satisfaction -unhappy                                                                                                    | 0        | ukbb           | European | 0.282   | 0.1038 | 0.0066 |
| Age at Menarche                                                                                                                              | 25231870 | reproductive   | European | 0.1417  | 0.0527 | 0.0071 |
| Transport type for commuting to job workplace: Cycle                                                                                         | 0        | ukbb           | European | -0.2693 | 0.1007 | 0.0075 |
| Pain type(s) experienced in last month: Facial pain                                                                                          | 0        | ukbb           | European | 0.3913  | 0.1466 | 0.0076 |
| Frequency of stair climbing in last 4 weeks                                                                                                  | 0        | ukbb           | European | -0.1933 | 0.0726 | 0.0077 |
| Reason for glasses/contact lenses: For short-sightedness_i.e. only or mainly for distance viewing such as driving_cinema etc (called myopia) | 0        | ukbb           | European | -0.2033 | 0.0764 | 0.0078 |
| Transport type for commuting to job workplace: Public transport                                                                              | 0        | ukbb           | European | -0.2634 | 0.0992 | 0.0079 |
| Difficulty not smoking for 1 day                                                                                                             | 0        | ukbb           | European | 0.3841  | 0.146  | 0.0085 |
| Number of self-reported cancers                                                                                                              | 0        | ukbb           | European | 0.3639  | 0.1383 | 0.0085 |
| Waist-to-hip ratio                                                                                                                           | 25673412 | anthropometric | European | 0.1413  | 0.054  | 0.0089 |
| Loneliness_isolation                                                                                                                         | 0        | ukbb           | European | 0.1851  | 0.0711 | 0.0092 |
| Infant head circumference                                                                                                                    | 22504419 | anthropometric | European | -0.3814 | 0.1469 | 0.0094 |
| Why stopped smoking: Doctors advice                                                                                                          | 0        | ukbb           | European | 0.4952  | 0.1907 | 0.0094 |
| Family relationship satisfaction -unhappy                                                                                                    | 0        | ukbb           | European | 0.2444  | 0.0944 | 0.0096 |
| Number of depression episodes                                                                                                                | 0        | ukbb           | European | 0.5403  | 0.2111 | 0.0105 |
| Bilateral oophorectomy (both ovaries removed)                                                                                                | 0        | ukbb           | European | 0.2863  | 0.1134 | 0.0116 |
| Knee pain for 3+ months                                                                                                                      | 0        | ukbb           | European | 0.359   | 0.1424 | 0.0117 |
| Fathers age at death                                                                                                                         | 27015805 | aging          | European | -0.2931 | 0.1169 | 0.0121 |
| Shortness of breath walking on level ground                                                                                                  | 0        | ukbb           | European | 0.2377  | 0.0958 | 0.0131 |
| Lifetime cannabis use                                                                                                                        | 30150663 | substance use  | European | 0.1941  | 0.0786 | 0.0136 |

|                                                                                                                              |          |                |          |         |        |        |
|------------------------------------------------------------------------------------------------------------------------------|----------|----------------|----------|---------|--------|--------|
| Illnesses of siblings: Diabetes                                                                                              | 0        | ukbb           | European | 0.2364  | 0.0958 | 0.0136 |
| Nervous feelings                                                                                                             | 0        | ukbb           | European | 0.1599  | 0.0648 | 0.0136 |
| Former alcohol drinker                                                                                                       | 0        | ukbb           | European | 0.2775  | 0.114  | 0.0149 |
| Illness_injury_bereavement_stress in last 2 years: None of the above                                                         | 0        | ukbb           | European | -0.197  | 0.0811 | 0.0151 |
| Ever manic/hyper for 2 days                                                                                                  | 0        | ukbb           | European | 0.3528  | 0.1469 | 0.0163 |
| Number of full brothers                                                                                                      | 0        | ukbb           | European | 0.1976  | 0.0825 | 0.0166 |
| Diagnoses - main ICD10: K20 Oesophagitis                                                                                     | 0        | ukbb           | European | 0.6944  | 0.2916 | 0.0172 |
| Automobile speeding                                                                                                          | 30643258 | risk behaviour | European | -0.1301 | 0.0551 | 0.0183 |
| Falls in the last year                                                                                                       | 0        | ukbb           | European | 0.1623  | 0.0689 | 0.0185 |
| Non-cancer illness code_self-reported: osteoarthritis                                                                        | 0        | ukbb           | European | 0.2115  | 0.0905 | 0.0194 |
| Tinnitus: Yes_now most or all of the time                                                                                    | 0        | ukbb           | European | -0.3127 | 0.1338 | 0.0195 |
| Mouth/teeth dental problems: Loose teeth                                                                                     | 0        | ukbb           | European | 0.2618  | 0.1133 | 0.0209 |
| Serumurate overweight                                                                                                        | 25811787 | uric_acid      | European | 0.2183  | 0.0947 | 0.0212 |
| Current employment status: In paid employment or self-employed                                                               | 0        | ukbb           | European | -0.2858 | 0.1244 | 0.0215 |
| Diagnoses - main ICD10: K51 Ulcerative colitis                                                                               | 0        | ukbb           | European | 0.493   | 0.2152 | 0.0219 |
| Diagnoses - main ICD10: R69 Unknown and unspecified causes of morbidity                                                      | 0        | ukbb           | European | 0.3605  | 0.1574 | 0.022  |
| Urate                                                                                                                        | 23263486 | other          | European | 0.1259  | 0.0557 | 0.0238 |
| 18:2 linoleic acid (LA)                                                                                                      | 27005778 | metabolites    | European | -0.3673 | 0.1665 | 0.0274 |
| Diagnoses - main ICD10: H26 Other cataract                                                                                   | 0        | ukbb           | European | -0.2505 | 0.1145 | 0.0287 |
| Diagnoses - main ICD10: N92 Excessive_frequent and irregular menstruation                                                    | 0        | ukbb           | European | 0.2615  | 0.1197 | 0.0288 |
| Current employment status: Retired                                                                                           | 0        | ukbb           | European | -0.2679 | 0.1227 | 0.029  |
| Medication for pain relief_constipation_heartburn: Aspirin                                                                   | 0        | ukbb           | European | 0.1763  | 0.0808 | 0.029  |
| Duration of moderate activity                                                                                                | 0        | ukbb           | European | 0.1725  | 0.0795 | 0.03   |
| Leg fat percentage (left)                                                                                                    | 0        | ukbb           | European | 0.0899  | 0.0418 | 0.0316 |
| Other serious medical condition/disability diagnosed by doctor                                                               | 0        | ukbb           | European | 0.1632  | 0.076  | 0.0318 |
| Diagnoses - main ICD10: Z47 Other orthopaedic follow-up care                                                                 | 0        | ukbb           | European | 0.4137  | 0.1935 | 0.0325 |
| Headaches for 3+ months                                                                                                      | 0        | ukbb           | European | 0.2473  | 0.1161 | 0.0331 |
| Alcohol drinker status: Previous                                                                                             | 0        | ukbb           | European | 0.2245  | 0.1054 | 0.0332 |
| Lung adenocarcinoma                                                                                                          | 27488534 | cancer         | European | 0.3711  | 0.1747 | 0.0337 |
| Pulse wave Arterial Stiffness index                                                                                          | 0        | ukbb           | European | 0.2506  | 0.1182 | 0.0339 |
| Eye problems/disorders: Cataract                                                                                             | 0        | ukbb           | European | -0.2855 | 0.1347 | 0.0341 |
| Subjective well being                                                                                                        | 27089181 | psychiatric    | European | -0.181  | 0.0862 | 0.0357 |
| Current employment status: Looking after home and/or family                                                                  | 0        | ukbb           | European | -0.2733 | 0.131  | 0.037  |
| Diagnoses - main ICD10: M20 Acquired deformities of fingers and toes                                                         | 0        | ukbb           | European | 0.2211  | 0.1063 | 0.0375 |
| PGC cross-disorder analysis                                                                                                  | 23453885 | psychiatric    | European | 0.1828  | 0.0882 | 0.0383 |
| Age when periods started (menarche)                                                                                          | 0        | ukbb           | European | 0.1045  | 0.051  | 0.0405 |
| Hand grip strength (right)                                                                                                   | 0        | ukbb           | European | -0.1    | 0.0489 | 0.041  |
| Leg fat percentage (right)                                                                                                   | 0        | ukbb           | European | 0.0863  | 0.0423 | 0.0411 |
| Tinnitus: Yes_but not now_but have in the past                                                                               | 0        | ukbb           | European | 0.3005  | 0.1496 | 0.0446 |
| Sodium in urine                                                                                                              | 0        | ukbb           | European | 0.1168  | 0.0582 | 0.0449 |
| Had menopause                                                                                                                | 0        | ukbb           | European | 0.2418  | 0.1208 | 0.0453 |
| Blood clot_DVT_bronchitis_emphysema_asthma_rhinitis_eczema_allergy diagnosed by doctor: Hayfever_allergic rhinitis or eczema | 0        | ukbb           | European | -0.1155 | 0.0577 | 0.0456 |
| Diagnoses - main ICD10: K44 Diaphragmatic hernia                                                                             | 0        | ukbb           | European | 0.399   | 0.2015 | 0.0478 |
| Non-cancer illness code_self-reported: crohns disease                                                                        | 0        | ukbb           | European | 0.3188  | 0.1614 | 0.0482 |
| Pulse wave peak to peak time                                                                                                 | 0        | ukbb           | European | -0.2273 | 0.1159 | 0.0498 |
| Illness_injury_bereavement_stress in last 2 years: Marital separation/divorce                                                | 0        | ukbb           | European | 0.3347  | 0.1708 | 0.05   |
| Fracture resulting from simple fall                                                                                          | 0        | ukbb           | European | 0.3202  | 0.1642 | 0.0512 |
| Non-cancer illness code_self-reported: angina                                                                                | 0        | ukbb           | European | 0.1547  | 0.0795 | 0.0517 |

|                                                                                                                            |          |                |          |         |        |        |
|----------------------------------------------------------------------------------------------------------------------------|----------|----------------|----------|---------|--------|--------|
| AUDIT-C                                                                                                                    | 30336701 | substance use  | European | 0.1301  | 0.067  | 0.0521 |
| Number of days/week of vigorous physical activity 10+ minutes                                                              | 0        | ukbb           | European | 0.131   | 0.0675 | 0.0522 |
| Fractured bone site(s): Other bones                                                                                        | 0        | ukbb           | European | 0.2513  | 0.1297 | 0.0527 |
| Why reduced smoking: Illness or ill health                                                                                 | 0        | ukbb           | European | 0.3497  | 0.1809 | 0.0532 |
| Diagnoses - main ICD10: K50 Crohns disease [regional enteritis]                                                            | 0        | ukbb           | European | 0.3557  | 0.1881 | 0.0586 |
| Non-cancer illness code_ self-reported: chronic obstructive airways disease/copd                                           | 0        | ukbb           | European | 0.3033  | 0.1611 | 0.0598 |
| Comparative body size at age 10                                                                                            | 0        | ukbb           | European | -0.0809 | 0.0434 | 0.0626 |
| Diagnoses - main ICD10: T84 Complications of internal orthopaedic prosthetic devices_ implants and grafts                  | 0        | ukbb           | European | 0.277   | 0.1496 | 0.0642 |
| Childhood IQ                                                                                                               | 23358156 | cognitive      | European | -0.2125 | 0.1149 | 0.0643 |
| Diagnoses - main ICD10: S66 Injury of muscle and tendon at wrist and hand level                                            | 0        | ukbb           | European | 0.4653  | 0.2515 | 0.0643 |
| Medication for cholesterol_ blood pressure_ diabetes_ or take exogenous hormones: None of the above                        | 0        | ukbb           | European | -0.1389 | 0.0751 | 0.0644 |
| Cancer code_ self-reported: basal cell carcinoma                                                                           | 0        | ukbb           | European | 0.2009  | 0.1087 | 0.0645 |
| Illnesses of siblings: Heart disease                                                                                       | 0        | ukbb           | European | 0.198   | 0.1078 | 0.0662 |
| Blood clot_ DVT_ bronchitis_ emphysema_ asthma_ rhinitis_ eczema_ allergy diagnosed by doctor: Blood clot in the leg (DVT) | 0        | ukbb           | European | 0.1983  | 0.1081 | 0.0666 |
| Diagnoses - main ICD10: K52 Other non-infective gastro-enteritis and colitis                                               | 0        | ukbb           | European | 0.2872  | 0.1578 | 0.0687 |
| Non-cancer illness code_ self-reported: diverticular disease/diverticulitis                                                | 0        | ukbb           | European | 0.2238  | 0.124  | 0.0711 |
| Vascular/heart problems diagnosed by doctor: Angina                                                                        | 0        | ukbb           | European | 0.1423  | 0.0796 | 0.0738 |
| Total lipids in very small VLDL                                                                                            | 27005778 | metabolites    | European | -0.2686 | 0.1503 | 0.074  |
| Cancer diagnosed by doctor                                                                                                 | 0        | ukbb           | European | 0.2354  | 0.1323 | 0.0752 |
| Duration of strenuous sports                                                                                               | 0        | ukbb           | European | 0.3772  | 0.213  | 0.0766 |
| Alcohol drinker status: Never                                                                                              | 0        | ukbb           | European | -0.155  | 0.088  | 0.078  |
| Illnesses of mother: Breast cancer                                                                                         | 0        | ukbb           | European | -0.2203 | 0.125  | 0.078  |
| Cholesterol esters in medium VLDL                                                                                          | 27005778 | metabolites    | European | -0.2253 | 0.1285 | 0.0795 |
| Non-cancer illness code_ self-reported: enlarged prostate                                                                  | 0        | ukbb           | European | -0.2689 | 0.1543 | 0.0813 |
| Mouth/teeth dental problems: Painful gums                                                                                  | 0        | ukbb           | European | 0.2661  | 0.1527 | 0.0815 |
| Leg fat mass (left)                                                                                                        | 0        | ukbb           | European | 0.0703  | 0.0404 | 0.082  |
| Diagnoses - main ICD10: I80 Phlebitis and thrombophlebitis                                                                 | 0        | ukbb           | European | 0.2279  | 0.1311 | 0.0821 |
| Diagnoses - main ICD10: M16 Coxarthrosis [arthrosis of hip]                                                                | 0        | ukbb           | European | 0.2083  | 0.1202 | 0.083  |
| Fractured/broken bones in last 5 years                                                                                     | 0        | ukbb           | European | 0.1645  | 0.0956 | 0.0852 |
| Free cholesterol in large HDL                                                                                              | 27005778 | metabolites    | European | 0.2218  | 0.129  | 0.0855 |
| Diagnoses - main ICD10: M17 Gonarthrosis [arthrosis of knee]                                                               | 0        | ukbb           | European | 0.1942  | 0.114  | 0.0883 |
| Squamous cell lung cancer                                                                                                  | 27488534 | cancer         | European | 0.3398  | 0.1996 | 0.0886 |
| Types of transport used (excluding work): Cycle                                                                            | 0        | ukbb           | European | -0.146  | 0.086  | 0.0894 |
| Medication for cholesterol_ blood pressure_ diabetes_ or take exogenous hormones: Cholesterol lowering medication          | 0        | ukbb           | European | 0.1341  | 0.079  | 0.0897 |
| Phospholipids in small VLDL                                                                                                | 27005778 | metabolites    | European | -0.2482 | 0.1477 | 0.0929 |
| Ever had bowel cancer screening                                                                                            | 0        | ukbb           | European | 0.1707  | 0.102  | 0.0943 |
| Free cholesterol to esterified cholesterol ratio                                                                           | 27005778 | metabolites    | European | -0.4049 | 0.2434 | 0.0962 |
| Vitamin and mineral supplements: Vitamin B                                                                                 | 0        | ukbb           | European | 0.211   | 0.1271 | 0.097  |
| Non-cancer illness code_ self-reported: retinal detachment                                                                 | 0        | ukbb           | European | -0.3748 | 0.2267 | 0.0982 |
| Sitting height ratio                                                                                                       | 25865494 | anthropometric | European | -0.1574 | 0.0952 | 0.0985 |
| Pain type(s) experienced in last month: Knee pain                                                                          | 0        | ukbb           | European | 0.1151  | 0.0697 | 0.0989 |
| Concentration of very small VLDL particles                                                                                 | 27005778 | metabolites    | European | -0.2319 | 0.1406 | 0.099  |
| Fasting proinsulin                                                                                                         | 20081858 | glycemic       | European | 0.2701  | 0.1642 | 0.1001 |

|                                                                               |          |              |          |         |        |        |
|-------------------------------------------------------------------------------|----------|--------------|----------|---------|--------|--------|
| Handedness (chirality/laterality): Left-handed                                | 0        | ukbb         | European | 0.1876  | 0.1142 | 0.1004 |
| Non-cancer illness code_ self-reported: deep venous thrombosis (dvt)          | 0        | ukbb         | European | 0.1776  | 0.1085 | 0.1016 |
| Doctor diagnosed hayfever or allergic rhinitis                                | 0        | ukbb         | European | -0.1419 | 0.0868 | 0.102  |
| Total lipids in small VLDL                                                    | 27005778 | metabolites  | European | -0.2207 | 0.1358 | 0.1043 |
| Diagnoses - main ICD10: I30 Acute pericarditis                                | 0        | ukbb         | European | -0.4716 | 0.2908 | 0.1048 |
| Systemic lupus erythematosus                                                  | 26502338 | autoimmune   | European | 0.1594  | 0.0986 | 0.1062 |
| Ever taken oral contraceptive pill                                            | 0        | ukbb         | European | 0.1803  | 0.1131 | 0.111  |
| Total lipids in large HDL                                                     | 27005778 | metabolites  | European | 0.1878  | 0.1181 | 0.1118 |
| Concentration of small VLDL particles                                         | 27005778 | metabolites  | European | -0.2052 | 0.1304 | 0.1156 |
| Reason for reducing amount of alcohol drunk: Health precaution                | 0        | ukbb         | European | 0.1412  | 0.0902 | 0.1174 |
| Leg fat mass (right)                                                          | 0        | ukbb         | European | 0.0635  | 0.0407 | 0.1187 |
| Phospholipids in very small VLDL                                              | 27005778 | metabolites  | European | -0.2675 | 0.1721 | 0.1201 |
| Diagnoses - main ICD10: I84 Haemorrhoids                                      | 0        | ukbb         | European | 0.1809  | 0.1167 | 0.1209 |
| Forced vital capacity (FVC) Best measure                                      | 0        | ukbb         | European | -0.0801 | 0.0519 | 0.1225 |
| Phospholipids in large HDL                                                    | 27005778 | metabolites  | European | 0.1864  | 0.1208 | 0.1228 |
| Free cholesterol                                                              | 27005778 | metabolites  | European | -0.392  | 0.2547 | 0.1238 |
| Cough on most days                                                            | 0        | ukbb         | European | 0.1683  | 0.1107 | 0.1283 |
| Mineral and other dietary supplements: Glucosamine                            | 0        | ukbb         | European | -0.1218 | 0.0801 | 0.1283 |
| Cholesterol esters in large VLDL                                              | 27005778 | metabolites  | European | -0.1773 | 0.1168 | 0.1289 |
| Diagnoses - main ICD10: K43 Ventral hernia                                    | 0        | ukbb         | European | 0.2079  | 0.137  | 0.129  |
| Diagnoses - main ICD10: J22 Unspecified acute lower respiratory infection     | 0        | ukbb         | European | 0.3181  | 0.2098 | 0.1296 |
| Getting up in morning                                                         | 0        | ukbb         | European | -0.0813 | 0.0538 | 0.131  |
| Illnesses of siblings: None of the above (group 2)                            | 0        | ukbb         | European | -0.1909 | 0.1265 | 0.1312 |
| Non-cancer illness code_ self-reported: pulmonary embolism +/- dvt            | 0        | ukbb         | European | 0.2267  | 0.1505 | 0.1318 |
| Diagnoses - main ICD10: K30 Dyspepsia                                         | 0        | ukbb         | European | 0.3716  | 0.2473 | 0.133  |
| Types of transport used (excluding work): Public transport                    | 0        | ukbb         | European | -0.131  | 0.0873 | 0.1336 |
| Diagnoses - main ICD10: I20 Angina pectoris                                   | 0        | ukbb         | European | 0.172   | 0.1148 | 0.134  |
| Amyotrophic lateral sclerosis                                                 | 27455348 | neurological | European | 0.2386  | 0.1602 | 0.1362 |
| Total cholesterol in small VLDL                                               | 27005778 | metabolites  | European | -0.267  | 0.1796 | 0.1372 |
| Description of average fatty acid chain length; not actual carbon number      | 27005778 | metabolites  | European | 0.2694  | 0.1815 | 0.1377 |
| Crohns disease                                                                | 26192919 | autoimmune   | European | 0.1057  | 0.0713 | 0.1381 |
| Inflammatory Bowel Disease (Euro)                                             | 26192919 | autoimmune   | European | 0.0908  | 0.0617 | 0.1413 |
| Total cholesterol in large VLDL                                               | 27005778 | metabolites  | European | -0.1867 | 0.1277 | 0.1439 |
| Cholesterol esters in large HDL                                               | 27005778 | metabolites  | European | 0.1777  | 0.1221 | 0.1456 |
| Diagnoses - main ICD10: K40 Inguinal hernia                                   | 0        | ukbb         | European | -0.1327 | 0.0913 | 0.1459 |
| Number of children ever born                                                  | 27798627 | reproductive | European | 0.1196  | 0.0824 | 0.1467 |
| Transport type for commuting to job workplace: Car/motor vehicle              | 0        | ukbb         | European | 0.1643  | 0.1134 | 0.1475 |
| Non-cancer illness code_ self-reported: hiatus hernia                         | 0        | ukbb         | European | 0.1985  | 0.1373 | 0.1483 |
| Concentration of large HDL particles                                          | 27005778 | metabolites  | European | 0.1691  | 0.1172 | 0.1491 |
| Triglycerides in IDL                                                          | 27005778 | metabolites  | European | -0.2028 | 0.1409 | 0.15   |
| Medication for pain relief_ constipation_ heartburn: Ibuprofen (e.g. Nurofen) | 0        | ukbb         | European | 0.121   | 0.0842 | 0.1507 |
| Diagnoses - main ICD10: C61 Malignant neoplasm of prostate                    | 0        | ukbb         | European | 0.2417  | 0.1693 | 0.1535 |
| Total cholesterol in large HDL                                                | 27005778 | metabolites  | European | 0.1818  | 0.1279 | 0.155  |
| Number of pregnancy terminations                                              | 0        | ukbb         | European | 0.1688  | 0.1189 | 0.1555 |
| Citrate                                                                       | 27005778 | metabolites  | European | -0.2841 | 0.2006 | 0.1566 |
| Triglycerides in very small VLDL                                              | 27005778 | metabolites  | European | -0.1805 | 0.1281 | 0.1588 |
| Omega-9 and saturated fatty acids                                             | 27005778 | metabolites  | European | -0.2483 | 0.1765 | 0.1596 |
| Diagnoses - main ICD10: N81 Female genital prolapse                           | 0        | ukbb         | European | 0.2132  | 0.152  | 0.1607 |
| Concentration of IDL particles                                                | 27005778 | metabolites  | European | -0.2637 | 0.189  | 0.1629 |
| Age at Menopause                                                              | 26414677 | reproductive | European | -0.1146 | 0.0824 | 0.1645 |
| Leptin_adjBMI                                                                 | 26833098 | hormone      | European | -0.16   | 0.1153 | 0.1651 |
| Mineral and other dietary supplements: Selenium                               | 0        | ukbb         | European | 0.2039  | 0.1471 | 0.1657 |

|                                                                                                          |          |                 |                    |         |        |        |
|----------------------------------------------------------------------------------------------------------|----------|-----------------|--------------------|---------|--------|--------|
| Mouth/teeth dental problems: Toothache                                                                   | 0        | ukbb            | European           | 0.1623  | 0.1176 | 0.1673 |
| Impedance of whole body                                                                                  | 0        | ukbb            | European           | 0.0559  | 0.0406 | 0.1679 |
| Bring up phlegm/sputum/mucus on most days                                                                | 0        | ukbb            | European           | 0.2104  | 0.1527 | 0.1681 |
| Systolic blood pressure_ automated reading                                                               | 0        | ukbb            | European           | -0.0708 | 0.0514 | 0.1684 |
| Triglycerides in small HDL                                                                               | 27005778 | metabolites     | European           | -0.2554 | 0.1861 | 0.1701 |
| Total lipids in IDL                                                                                      | 27005778 | metabolites     | European           | -0.2717 | 0.1983 | 0.1706 |
| Mean diameter for HDL particles                                                                          | 27005778 | metabolites     | European           | 0.1672  | 0.1223 | 0.1716 |
| Illnesses of father: Diabetes                                                                            | 0        | ukbb            | European           | -0.1263 | 0.0931 | 0.1747 |
| Non-cancer illness code_ self-reported: asthma                                                           | 0        | ukbb            | European           | 0.0782  | 0.0576 | 0.175  |
| Rheumatoid Arthritis                                                                                     | 24390342 | autoimmune      | European           | 0.1303  | 0.0966 | 0.1777 |
| Free cholesterol in small VLDL                                                                           | 27005778 | metabolites     | European           | -0.2074 | 0.1544 | 0.1793 |
| Diagnoses - main ICD10: J33 Nasal polyp                                                                  | 0        | ukbb            | European           | 0.2181  | 0.1625 | 0.1796 |
| Vitamin and mineral supplements: Multivitamins +/- minerals                                              | 0        | ukbb            | European           | 0.1076  | 0.0804 | 0.1812 |
| Triglycerides in small VLDL                                                                              | 27005778 | metabolites     | European           | -0.181  | 0.1358 | 0.1826 |
| Serum total cholesterol                                                                                  | 27005778 | metabolites     | European           | -0.2854 | 0.2146 | 0.1836 |
| Diagnoses - main ICD10: F31 Bipolar affective disorder                                                   | 0        | ukbb            | European           | 0.2244  | 0.1689 | 0.184  |
| Non-cancer illness code_ self-reported: hypertension                                                     | 0        | ukbb            | European           | 0.0671  | 0.0506 | 0.185  |
| Glycoprotein acetyls; mainly a1-acid glycoprotein                                                        | 27005778 | metabolites     | European           | -0.2025 | 0.1539 | 0.1883 |
| Urinary albumin-to-creatinine ratio (non-diabetes)                                                       | 26631737 | kidney          | European           | 0.1453  | 0.1109 | 0.1904 |
| Femoral Neck bone mineral density                                                                        | 26367794 | bone            | European           | 0.1232  | 0.0943 | 0.1914 |
| Illnesses of mother: Alzheimers disease/dementia                                                         | 0        | ukbb            | European           | -0.4058 | 0.3125 | 0.1941 |
| Illnesses of mother: None of the above (group 2)                                                         | 0        | ukbb            | European           | -0.1809 | 0.1395 | 0.1947 |
| Diagnoses - main ICD10: R55 Syncope and collapse                                                         | 0        | ukbb            | European           | 0.1688  | 0.1305 | 0.1958 |
| Eye problems/disorders: Diabetes related eye disease                                                     | 0        | ukbb            | European           | 0.1864  | 0.1445 | 0.197  |
| Free cholesterol in large VLDL                                                                           | 27005778 | metabolites     | European           | -0.1586 | 0.1231 | 0.1976 |
| Diagnoses - main ICD10: C50 Malignant neoplasm of breast                                                 | 0        | ukbb            | European           | 0.1454  | 0.1129 | 0.1977 |
| Serum creatinine                                                                                         | 26831199 | kidney          | European & African | 0.0871  | 0.0678 | 0.1989 |
| Ever stopped smoking for 6+ months                                                                       | 0        | ukbb            | European           | 0.2204  | 0.172  | 0.2002 |
| Non-cancer illness code_ self-reported: mania/bipolar disorder/manic depression                          | 0        | ukbb            | European           | 0.2303  | 0.1805 | 0.2021 |
| Type of tobacco previously smoked: Cigars or pipes                                                       | 0        | ukbb            | European           | -0.2808 | 0.2205 | 0.2028 |
| Illness_injury_bereavement_stress in last 2 years: Serious illness_injury or assault of a close relative | 0        | ukbb            | European           | -0.1584 | 0.1245 | 0.2033 |
| Leg pain on walking                                                                                      | 0        | ukbb            | European           | 0.1114  | 0.0877 | 0.204  |
| Total cholesterol in medium VLDL                                                                         | 27005778 | metabolites     | European           | -0.1725 | 0.1362 | 0.2052 |
| Diagnoses - main ICD10: I25 Chronic ischaemic heart disease                                              | 0        | ukbb            | European           | 0.1088  | 0.0859 | 0.2053 |
| Home area population density - urban or rural: Scotland - Large Urban Area                               | 0        | ukbb            | European           | -0.1831 | 0.1446 | 0.2053 |
| Cholesterol esters in medium LDL                                                                         | 27005778 | metabolites     | European           | -0.2717 | 0.2159 | 0.2081 |
| Diastolic blood pressure_ automated reading                                                              | 0        | ukbb            | European           | -0.062  | 0.0493 | 0.2086 |
| Diagnoses - main ICD10: K22 Other diseases of oesophagus                                                 | 0        | ukbb            | European           | 0.2536  | 0.2019 | 0.2091 |
| Total cholesterol in IDL                                                                                 | 27005778 | metabolites     | European           | -0.2666 | 0.2124 | 0.2093 |
| Total lipids in very large HDL                                                                           | 27005778 | metabolites     | European           | 0.2348  | 0.1877 | 0.211  |
| Diagnoses - main ICD10: N32 Other disorders of bladder                                                   | 0        | ukbb            | European           | 0.1945  | 0.1556 | 0.2112 |
| Alcohol intake versus 10 years previously - less nowadays                                                | 0        | ukbb            | European           | 0.0904  | 0.0725 | 0.2129 |
| Difference in height between childhood and adulthood; age 8                                              | 23449627 | anthropometri c | European           | -0.1355 | 0.1094 | 0.2153 |
| Waist circumference                                                                                      | 25673412 | anthropometri c | European           | 0.0619  | 0.0503 | 0.2183 |

|                                                                                                                       |          |                    |                    |         |        |        |
|-----------------------------------------------------------------------------------------------------------------------|----------|--------------------|--------------------|---------|--------|--------|
| Total cholesterol in HDL                                                                                              | 27005778 | metabolites        | European           | 0.1689  | 0.1379 | 0.2206 |
| Diagnoses - main ICD10: R04 Haemorrhage from respiratory passages                                                     | 0        | ukbb               | European           | 0.2876  | 0.2352 | 0.2213 |
| Illnesses of mother: Heart disease                                                                                    | 0        | ukbb               | European           | 0.1261  | 0.1035 | 0.2228 |
| Mono-unsaturated fatty acids                                                                                          | 27005778 | metabolites        | European           | -0.1745 | 0.144  | 0.2257 |
| Types of physical activity in last 4 weeks: Strenuous sports                                                          | 0        | ukbb               | European           | -0.1112 | 0.0922 | 0.2274 |
| Blood clot_ DVT_ bronchitis_ emphysema_ asthma_ rhinitis_ eczema_ allergy diagnosed by doctor: Asthma                 | 0        | ukbb               | European           | 0.0676  | 0.0564 | 0.2308 |
| Father still alive                                                                                                    | 0        | ukbb               | European           | -0.1773 | 0.148  | 0.231  |
| Forced expiratory volume in 1 second (FEV1)                                                                           | 28166213 | lung_function      | European           | -0.077  | 0.0644 | 0.2319 |
| Serum total triglycerides                                                                                             | 27005778 | metabolites        | European           | -0.1539 | 0.1288 | 0.2322 |
| ICV                                                                                                                   | 25607358 | brain_volume       | European           | -0.1688 | 0.1414 | 0.2324 |
| Mineral and other dietary supplements: Calcium                                                                        | 0        | ukbb               | European           | -0.136  | 0.1139 | 0.2324 |
| Duration of heavy DIY                                                                                                 | 0        | ukbb               | European           | -0.1158 | 0.0973 | 0.2339 |
| Cholesterol esters in large LDL                                                                                       | 27005778 | metabolites        | European           | -0.2651 | 0.2248 | 0.2382 |
| Phenylalanine                                                                                                         | 27005778 | metabolites        | European           | -0.232  | 0.1969 | 0.2387 |
| Blood clot_ DVT_ bronchitis_ emphysema_ asthma_ rhinitis_ eczema_ allergy diagnosed by doctor: Blood clot in the lung | 0        | ukbb               | European           | 0.1707  | 0.1449 | 0.239  |
| Frequency of travelling from home to job workplace                                                                    | 0        | ukbb               | European           | 0.1427  | 0.1214 | 0.2397 |
| Non-cancer illness code_ self-reported: hypothyroidism/myxoedema                                                      | 0        | ukbb               | European           | 0.08    | 0.068  | 0.2397 |
| Mouth/teeth dental problems: Bleeding gums                                                                            | 0        | ukbb               | European           | 0.1029  | 0.0877 | 0.2404 |
| Duration of fitness test                                                                                              | 0        | ukbb               | European           | -0.2319 | 0.1976 | 0.2405 |
| Leptin_not_adjBMI                                                                                                     | 26833098 | hormone            | European           | -0.1328 | 0.1133 | 0.2415 |
| Reproducibility of spirometry measurement using ERS/ATS criteria                                                      | 0        | ukbb               | European           | -0.1338 | 0.1144 | 0.2422 |
| Phospholipids in very large HDL                                                                                       | 27005778 | metabolites        | European           | 0.158   | 0.139  | 0.2559 |
| Forearm Bone mineral density                                                                                          | 26367794 | bone               | European           | 0.2385  | 0.2104 | 0.257  |
| Mean diameter for VLDL particles                                                                                      | 27005778 | metabolites        | European           | -0.1361 | 0.121  | 0.2607 |
| Phospholipids in IDL                                                                                                  | 27005778 | metabolites        | European           | -0.2369 | 0.211  | 0.2617 |
| Non-cancer illness code_ self-reported: high cholesterol                                                              | 0        | ukbb               | European           | 0.0884  | 0.0788 | 0.2619 |
| Forced Vital capacity(FVC)                                                                                            | 28166213 | lung_function      | European           | -0.0732 | 0.0663 | 0.27   |
| Tinnitus: Yes_ now some of the time                                                                                   | 0        | ukbb               | European           | 0.2808  | 0.2546 | 0.2701 |
| Diagnoses - main ICD10: M67 Other disorders of synovium and tendon                                                    | 0        | ukbb               | European           | 0.2634  | 0.2408 | 0.274  |
| Obesity class 2                                                                                                       | 23563607 | anthropometri<br>c | European           | 0.0701  | 0.0643 | 0.2755 |
| Concentration of large LDL particles                                                                                  | 27005778 | metabolites        | European           | -0.2269 | 0.2085 | 0.2765 |
| Total lipids in large LDL                                                                                             | 27005778 | metabolites        | European           | -0.2337 | 0.2148 | 0.2765 |
| Alzheimers disease                                                                                                    | 30617256 | neurological       | European           | 0.1516  | 0.1397 | 0.2777 |
| Diagnoses - main ICD10: I48 Atrial fibrillation and flutter                                                           | 0        | ukbb               | European           | 0.1206  | 0.1111 | 0.2778 |
| Non-cancer illness code_ self-reported: muscle or soft tissue injuries                                                | 0        | ukbb               | European           | 0.2335  | 0.2168 | 0.2815 |
| Serum creatinine (non-diabetes)                                                                                       | 26831199 | kidney             | European & African | 0.0731  | 0.0681 | 0.283  |
| Chronic Kidney Disease                                                                                                | 26831199 | kidney             | European & African | -0.1861 | 0.1752 | 0.2884 |
| Diagnoses - main ICD10: S09 Other and unspecified injuries of head                                                    | 0        | ukbb               | European           | 0.2237  | 0.2111 | 0.2892 |
| Duration of vigorous activity                                                                                         | 0        | ukbb               | European           | 0.0986  | 0.0934 | 0.2912 |
| Reason for glasses/contact lenses: For astigmatism                                                                    | 0        | ukbb               | European           | -0.1304 | 0.1238 | 0.2925 |
| Free cholesterol in very large HDL                                                                                    | 27005778 | metabolites        | European           | 0.1954  | 0.1865 | 0.2947 |
| Diagnoses - main ICD10: Z09 Follow-up examination after treatment for conditions other than malignant neoplasms       | 0        | ukbb               | European           | 0.2053  | 0.1962 | 0.2955 |
| Triglycerides                                                                                                         | 20686565 | lipids             | European           | 0.0685  | 0.0658 | 0.2979 |
| Free cholesterol in IDL                                                                                               | 27005778 | metabolites        | European           | -0.1953 | 0.1878 | 0.2983 |
| Platelet count                                                                                                        | 22139419 | haematologica<br>l | European           | 0.0704  | 0.0681 | 0.3009 |

|                                                                                      |          |                  |                                                                |         |        |        |
|--------------------------------------------------------------------------------------|----------|------------------|----------------------------------------------------------------|---------|--------|--------|
| Total cholesterol in large LDL                                                       | 27005778 | metabolites      | European                                                       | -0.2207 | 0.2147 | 0.3038 |
| Coronary artery disease                                                              | 26343387 | cardiometabolite | European, South Asian, East Asian, Hispanic & African American | 0.0632  | 0.0615 | 0.304  |
| Apolipoprotein B                                                                     | 27005778 | metabolites      | European                                                       | -0.1887 | 0.1843 | 0.306  |
| Omega-3 fatty acids                                                                  | 27005778 | metabolites      | European                                                       | -0.1503 | 0.1469 | 0.3062 |
| Total lipids in medium LDL                                                           | 27005778 | metabolites      | European                                                       | -0.2081 | 0.2045 | 0.3089 |
| Vascular/heart problems diagnosed by doctor: None of the above                       | 0        | ukbb             | European                                                       | -0.0511 | 0.0504 | 0.3099 |
| Pulse rate_ automated reading                                                        | 0        | ukbb             | European                                                       | 0.0555  | 0.0547 | 0.31   |
| Concentration of medium LDL particles                                                | 27005778 | metabolites      | European                                                       | -0.2047 | 0.202  | 0.3109 |
| Vascular/heart problems diagnosed by doctor: Heart attack                            | 0        | ukbb             | European                                                       | 0.0831  | 0.0821 | 0.3117 |
| Non-cancer illness code_ self-reported: heart attack/myocardial infarction           | 0        | ukbb             | European                                                       | 0.0812  | 0.0805 | 0.313  |
| Diagnoses - main ICD10: B37 Candidiasis                                              | 0        | ukbb             | European                                                       | 0.5244  | 0.5237 | 0.3167 |
| Daytime dozing / sleeping (narcolepsy)                                               | 0        | ukbb             | European                                                       | 0.0681  | 0.0686 | 0.3208 |
| Happiness -unhappy                                                                   | 0        | ukbb             | European                                                       | 0.092   | 0.0929 | 0.322  |
| Relative age voice broke                                                             | 0        | ukbb             | European                                                       | -0.0672 | 0.068  | 0.3236 |
| Neo-conscientiousness                                                                | 21173776 | personality      | European                                                       | -0.173  | 0.1766 | 0.3272 |
| Isoleucine                                                                           | 27005778 | metabolites      | European                                                       | -0.1745 | 0.1792 | 0.3302 |
| Vascular/heart problems diagnosed by doctor: High blood pressure                     | 0        | ukbb             | European                                                       | 0.0492  | 0.051  | 0.3343 |
| Mean Hippocampus                                                                     | 25607358 | brain_volume     | European                                                       | 0.1743  | 0.1808 | 0.335  |
| Qualifications: NVQ or HND or HNC or equivalent                                      | 0        | ukbb             | European                                                       | 0.089   | 0.0924 | 0.3354 |
| Triglycerides in very large VLDL                                                     | 27005778 | metabolites      | European                                                       | -0.1232 | 0.1282 | 0.3364 |
| Total lipids in very large VLDL                                                      | 27005778 | metabolites      | European                                                       | -0.1158 | 0.1207 | 0.3372 |
| Eczema                                                                               | 26482879 | autoimmune       | European, African, East Asian & Hispanic                       | 0.1106  | 0.1165 | 0.3423 |
| Total lipids in medium VLDL                                                          | 27005778 | metabolites      | European                                                       | -0.1206 | 0.1275 | 0.3442 |
| Primary biliary cirrhosis                                                            | 26394269 | autoimmune       | European                                                       | 0.0886  | 0.0939 | 0.3453 |
| Illnesses of father: None of the above (group 1)                                     | 0        | ukbb             | European                                                       | 0.1077  | 0.1141 | 0.3454 |
| Length of working week for main job                                                  | 0        | ukbb             | European                                                       | 0.1075  | 0.114  | 0.3454 |
| Mean platelet volume                                                                 | 22139419 | haematological   | European                                                       | -0.0791 | 0.0847 | 0.3501 |
| Back pain for 3+ months                                                              | 0        | ukbb             | European                                                       | 0.1     | 0.1071 | 0.3502 |
| Apolipoprotein A-I                                                                   | 27005778 | metabolites      | European                                                       | 0.1559  | 0.1669 | 0.3503 |
| Home area population density - urban or rural: England/Wales - Village - less sparse | 0        | ukbb             | European                                                       | -0.2535 | 0.2728 | 0.3526 |
| Frequency of light DIY in last 4 weeks                                               | 0        | ukbb             | European                                                       | -0.1116 | 0.1201 | 0.3529 |
| Vitamin and mineral supplements: Vitamin A                                           | 0        | ukbb             | European                                                       | 0.1764  | 0.1901 | 0.3532 |
| Total cholesterol in small LDL                                                       | 27005778 | metabolites      | European                                                       | -0.2042 | 0.2205 | 0.3546 |
| Concentration of medium VLDL particles                                               | 27005778 | metabolites      | European                                                       | -0.1107 | 0.1196 | 0.3548 |
| Pulse rate                                                                           | 0        | ukbb             | European                                                       | -0.067  | 0.0725 | 0.3556 |
| Mean Pallidum                                                                        | 25607358 | brain_volume     | European                                                       | 0.1114  | 0.1208 | 0.3563 |
| Ever had prostate specific antigen (PSA) test                                        | 0        | ukbb             | European                                                       | -0.0956 | 0.1037 | 0.3564 |
| Phospholipids in medium VLDL                                                         | 27005778 | metabolites      | European                                                       | -0.1256 | 0.1366 | 0.3579 |
| Free cholesterol in medium HDL                                                       | 27005778 | metabolites      | European                                                       | 0.1425  | 0.1554 | 0.3591 |
| Lumbar Spine bone mineral density                                                    | 26367794 | bone             | European                                                       | 0.0847  | 0.0933 | 0.364  |
| Ulcerative colitis                                                                   | 26192919 | autoimmune       | European                                                       | 0.0711  | 0.0784 | 0.3643 |
| Cancer code_ self-reported: squamous cell carcinoma                                  | 0        | ukbb             | European                                                       | 0.2673  | 0.2965 | 0.3674 |
| Mean diameter for LDL particles                                                      | 27005778 | metabolites      | European                                                       | -0.1952 | 0.2167 | 0.3678 |
| Tyrosine                                                                             | 27005778 | metabolites      | European                                                       | 0.1331  | 0.1479 | 0.3683 |
| Child birth weight                                                                   | 23202124 | anthropometric   | European                                                       | -0.1037 | 0.1158 | 0.3706 |
| Primary sclerosing cholangitis                                                       | 27992413 | autoimmune       | European & non-                                                | -0.092  | 0.1029 | 0.3713 |



|                                                                                                       |          |               |          |         |        |        |
|-------------------------------------------------------------------------------------------------------|----------|---------------|----------|---------|--------|--------|
|                                                                                                       |          |               | European |         |        |        |
| Non-cancer illness code_ self-reported: joint disorder                                                | 0        | ukbb          | European | 0.2414  | 0.2703 | 0.3718 |
| Frequency of other exercises in last 4 weeks                                                          | 0        | ukbb          | European | 0.1024  | 0.1147 | 0.3721 |
| Time spent driving                                                                                    | 0        | ukbb          | European | -0.0644 | 0.0724 | 0.3741 |
| Leg predicted mass (right)                                                                            | 0        | ukbb          | European | -0.04   | 0.045  | 0.3749 |
| Leg fat-free mass (right)                                                                             | 0        | ukbb          | European | -0.0395 | 0.045  | 0.3796 |
| Distance between home and job workplace                                                               | 0        | ukbb          | European | -0.1397 | 0.159  | 0.3798 |
| Arm predicted mass (left)                                                                             | 0        | ukbb          | European | 0.0381  | 0.0436 | 0.3817 |
| Phospholipids in large LDL                                                                            | 27005778 | metabolites   | European | -0.1777 | 0.2032 | 0.3818 |
| Forced expiratory volume in 1 second (FEV1)/Forced Vital capacity(FVC)                                | 28166213 | lung_function | European | -0.0566 | 0.0656 | 0.3881 |
| Concentration of small LDL particles                                                                  | 27005778 | metabolites   | European | -0.1453 | 0.1701 | 0.3931 |
| HbA1C                                                                                                 | 20858683 | glycemic      | European | -0.1027 | 0.1205 | 0.394  |
| Alcohol intake frequency - lower frequency                                                            | 0        | ukbb          | European | -0.0441 | 0.052  | 0.3955 |
| Phospholipids in very large VLDL                                                                      | 27005778 | metabolites   | European | -0.112  | 0.1318 | 0.3956 |
| Diagnoses - main ICD10: R31 Unspecified haematuria                                                    | 0        | ukbb          | European | 0.1687  | 0.1995 | 0.3977 |
| Underlying (primary) cause of death: ICD10: J84.1 Other interstitial pulmonary diseases with fibrosis | 0        | ukbb          | European | -0.1818 | 0.216  | 0.4    |
| Duration of light DIY                                                                                 | 0        | ukbb          | European | -0.078  | 0.0928 | 0.4006 |
| Illnesses of father: High blood pressure                                                              | 0        | ukbb          | European | -0.0847 | 0.1016 | 0.4045 |
| Diagnoses - main ICD10: K35 Acute appendicitis                                                        | 0        | ukbb          | European | -0.1592 | 0.1923 | 0.4079 |
| Non-cancer illness code_ self-reported: hyperthyroidism/thyrototoxicosis                              | 0        | ukbb          | European | 0.1004  | 0.1217 | 0.4093 |
| Whole body fat mass                                                                                   | 0        | ukbb          | European | 0.0331  | 0.0401 | 0.4093 |
| Transferrin                                                                                           | 25352340 | metal         | European | 0.0808  | 0.0981 | 0.4101 |
| Weight change compared with 1 year ago                                                                | 0        | ukbb          | European | 0.0959  | 0.117  | 0.4123 |
| Hand grip strength (left)                                                                             | 0        | ukbb          | European | -0.0393 | 0.0485 | 0.4175 |
| Creatinine (enzymatic) in urine                                                                       | 0        | ukbb          | European | 0.0458  | 0.057  | 0.4213 |
| Hair/balding pattern: Pattern 2                                                                       | 0        | ukbb          | European | 0.0651  | 0.0812 | 0.423  |
| Fractured bone site(s): Ankle                                                                         | 0        | ukbb          | European | 0.1363  | 0.1716 | 0.4269 |
| Heel bone mineral density (BMD) T-score_ automated (left)                                             | 0        | ukbb          | European | -0.0438 | 0.0552 | 0.4273 |
| Free cholesterol in medium VLDL                                                                       | 27005778 | metabolites   | European | -0.1067 | 0.1353 | 0.4305 |
| Had other major operations                                                                            | 0        | ukbb          | European | 0.0763  | 0.0978 | 0.4352 |
| Neo-openness to experience                                                                            | 21173776 | personality   | European | -0.1153 | 0.1483 | 0.4369 |
| Albumin                                                                                               | 27005778 | metabolites   | European | -0.1694 | 0.2186 | 0.4383 |
| Illnesses of siblings: High blood pressure                                                            | 0        | ukbb          | European | 0.0615  | 0.0795 | 0.4391 |
| Diagnoses - main ICD10: M10 Gout                                                                      | 0        | ukbb          | European | 0.2266  | 0.293  | 0.4393 |
| Diagnoses - main ICD10: I10 Essential (primary) hypertension                                          | 0        | ukbb          | European | 0.2014  | 0.2605 | 0.4394 |
| Mean Thalamus                                                                                         | 25607358 | brain_volume  | European | -0.1191 | 0.1541 | 0.4395 |
| Trunk fat percentage                                                                                  | 0        | ukbb          | European | 0.0317  | 0.0411 | 0.4411 |
| Total lipids in chylomicrons and largest VLDL particles                                               | 27005778 | metabolites   | European | -0.0935 | 0.122  | 0.4437 |
| Total lipids in small LDL                                                                             | 27005778 | metabolites   | European | -0.1387 | 0.1816 | 0.445  |
| Hearing difficulty/problems: Yes                                                                      | 0        | ukbb          | European | 0.0472  | 0.0619 | 0.446  |
| Duration of walks                                                                                     | 0        | ukbb          | European | 0.0518  | 0.068  | 0.4461 |
| Trunk fat mass                                                                                        | 0        | ukbb          | European | 0.0312  | 0.041  | 0.4464 |
| Target heart rate achieved                                                                            | 0        | ukbb          | European | 0.1307  | 0.1722 | 0.4477 |
| Cholesterol esters in medium HDL                                                                      | 27005778 | metabolites   | European | 0.1417  | 0.1868 | 0.4482 |
| Arm predicted mass (right)                                                                            | 0        | ukbb          | European | 0.0343  | 0.0452 | 0.4486 |
| Non-cancer illness code_ self-reported: type 2 diabetes                                               | 0        | ukbb          | European | -0.1054 | 0.1398 | 0.4512 |
| Arm fat-free mass (left)                                                                              | 0        | ukbb          | European | 0.0331  | 0.0442 | 0.4541 |
| Cancer code_ self-reported: malignant melanoma                                                        | 0        | ukbb          | European | 0.1307  | 0.1756 | 0.4568 |
| Free cholesterol in large LDL                                                                         | 27005778 | metabolites   | European | -0.1508 | 0.2027 | 0.4569 |
| Non-cancer illness code_ self-reported: ulcerative colitis                                            | 0        | ukbb          | European | 0.1061  | 0.1443 | 0.4622 |
| Pulse wave reflection index                                                                           | 0        | ukbb          | European | 0.0738  | 0.1005 | 0.4626 |
| No-wear time bias adjusted acceleration standard deviation                                            | 0        | ukbb          | European | -0.0702 | 0.0959 | 0.4641 |
| Concentration of very large HDL particles                                                             | 27005778 | metabolites   | European | 0.1096  | 0.1503 | 0.466  |

|                                                                                                            |          |                |                    |         |        |        |
|------------------------------------------------------------------------------------------------------------|----------|----------------|--------------------|---------|--------|--------|
| Total cholesterol in very large HDL                                                                        | 27005778 | metabolites    | European           | 0.159   | 0.2187 | 0.4673 |
| Leg predicted mass (left)                                                                                  | 0        | ukbb           | European           | -0.0321 | 0.0445 | 0.4702 |
| Non-cancer illness code_ self-reported: iron deficiency anaemia                                            | 0        | ukbb           | European           | 0.1264  | 0.1756 | 0.4715 |
| Leg fat-free mass (left)                                                                                   | 0        | ukbb           | European           | -0.032  | 0.0444 | 0.4716 |
| Fractured bone site(s): Arm                                                                                | 0        | ukbb           | European           | 0.1274  | 0.1782 | 0.4745 |
| Diagnoses - main ICD10: R14 Flatulence and related conditions                                              | 0        | ukbb           | European           | -0.1364 | 0.191  | 0.4751 |
| Phospholipids in large VLDL                                                                                | 27005778 | metabolites    | European           | -0.0927 | 0.1301 | 0.4763 |
| Diagnoses - main ICD10: E04 Other non-toxic goitre                                                         | 0        | ukbb           | European           | 0.1289  | 0.181  | 0.4766 |
| Arm fat-free mass (right)                                                                                  | 0        | ukbb           | European           | 0.032   | 0.045  | 0.4772 |
| Birth weight of first child                                                                                | 0        | ukbb           | European           | -0.0444 | 0.0632 | 0.4821 |
| Serum cystatin c                                                                                           | 26831199 | kidney         | European & African | 0.0712  | 0.1015 | 0.4827 |
| Reason for glasses/contact lenses: For just reading/near work as you are getting older (called presbyopia) | 0        | ukbb           | European           | 0.1276  | 0.1837 | 0.4874 |
| Total lipids in medium HDL                                                                                 | 27005778 | metabolites    | European           | 0.1233  | 0.1776 | 0.4875 |
| Non-cancer illness code_ self-reported: nasal polyps                                                       | 0        | ukbb           | European           | 0.1034  | 0.1494 | 0.4888 |
| Non-cancer illness code_ self-reported: bone disorder                                                      | 0        | ukbb           | European           | 0.2431  | 0.3568 | 0.4957 |
| Celiac disease                                                                                             | 20190752 | autoimmune     | European           | -0.0876 | 0.129  | 0.4974 |
| Diagnoses - main ICD10: Z80 Family history of malignant neoplasm                                           | 0        | ukbb           | European           | -0.204  | 0.3012 | 0.4983 |
| Total cholesterol in LDL                                                                                   | 27005778 | metabolites    | European           | -0.141  | 0.2084 | 0.4986 |
| Non-cancer illness code_ self-reported: psoriasis                                                          | 0        | ukbb           | European           | -0.0871 | 0.1288 | 0.4988 |
| Diagnoses - main ICD10: D25 Leiomyoma of uterus                                                            | 0        | ukbb           | European           | 0.1018  | 0.1507 | 0.4991 |
| Concentration of chylomicrons and largest VLDL particles                                                   | 27005778 | metabolites    | European           | -0.0939 | 0.1394 | 0.5005 |
| Parkinsons disease                                                                                         | 19915575 | neurological   | European           | -0.0705 | 0.1052 | 0.5027 |
| Glutamine                                                                                                  | 27005778 | metabolites    | European           | 0.1021  | 0.1526 | 0.5036 |
| Anorexia Nervosa                                                                                           | 28494655 | psychiatric    | European           | 0.0783  | 0.1174 | 0.5047 |
| Diagnoses - main ICD10: R35 Polyuria                                                                       | 0        | ukbb           | European           | -0.1669 | 0.2526 | 0.5087 |
| Diagnoses - main ICD10: K76 Other diseases of liver                                                        | 0        | ukbb           | European           | 0.1477  | 0.2253 | 0.5121 |
| Difference in height between adolescence and adulthood; age 14                                             | 23449627 | anthropometric | European           | 0.0877  | 0.1341 | 0.513  |
| Diagnoses - main ICD10: L03 Cellulitis                                                                     | 0        | ukbb           | European           | 0.129   | 0.198  | 0.5147 |
| Asthma                                                                                                     | 17611496 | autoimmune     | European           | 0.0906  | 0.1395 | 0.5157 |
| Average weekly spirits intake                                                                              | 0        | ukbb           | European           | -0.0576 | 0.0889 | 0.5174 |
| Phospholipids in medium HDL                                                                                | 27005778 | metabolites    | European           | 0.1003  | 0.155  | 0.5177 |
| Phospholipids in chylomicrons and largest VLDL particles                                                   | 27005778 | metabolites    | European           | -0.0852 | 0.1333 | 0.523  |
| Most recent bowel cancer screening                                                                         | 0        | ukbb           | European           | 0.1277  | 0.2008 | 0.5248 |
| Total lipids in large VLDL                                                                                 | 27005778 | metabolites    | European           | -0.0763 | 0.1209 | 0.5279 |
| Mean Accumbens                                                                                             | 25607358 | brain_volume   | European           | 0.1448  | 0.23   | 0.5292 |
| Concentration of medium HDL particles                                                                      | 27005778 | metabolites    | European           | 0.1095  | 0.1742 | 0.5296 |
| Non-cancer illness code_ self-reported: varicose veins                                                     | 0        | ukbb           | European           | -0.1051 | 0.1675 | 0.5306 |
| Total cholesterol in medium LDL                                                                            | 27005778 | metabolites    | European           | -0.1246 | 0.1998 | 0.5329 |
| Total cholesterol in medium HDL                                                                            | 27005778 | metabolites    | European           | 0.1063  | 0.1709 | 0.5337 |
| Extreme bmi                                                                                                | 23563607 | anthropometric | European           | 0.049   | 0.0788 | 0.5343 |
| Non-cancer illness code_ self-reported: migraine                                                           | 0        | ukbb           | European           | -0.0524 | 0.0845 | 0.5356 |
| Non-cancer illness code_ self-reported: sleep apnoea                                                       | 0        | ukbb           | European           | 0.1314  | 0.2124 | 0.5361 |
| Diagnoses - main ICD10: D12 Benign neoplasm of colon_rectum_anus and anal canal                            | 0        | ukbb           | European           | -0.0729 | 0.1181 | 0.537  |
| Diagnoses - main ICD10: K80 Cholelithiasis                                                                 | 0        | ukbb           | European           | 0.0723  | 0.1187 | 0.5425 |
| HDL cholesterol                                                                                            | 20686565 | lipids         | European           | -0.0425 | 0.0698 | 0.5428 |
| Illness_injury_bereavement_stress in last 2                                                                | 0        | ukbb           | European           | 0.0882  | 0.146  | 0.5458 |

|                                                                                                                                                          |          |                |                         |         |        |        |
|----------------------------------------------------------------------------------------------------------------------------------------------------------|----------|----------------|-------------------------|---------|--------|--------|
| years: Death of a close relative                                                                                                                         |          |                |                         |         |        |        |
| Other eye problems                                                                                                                                       | 0        | ukbb           | European                | 0.0778  | 0.1295 | 0.5478 |
| Mineral and other dietary supplements: None of the above                                                                                                 | 0        | ukbb           | European                | 0.0493  | 0.0825 | 0.5496 |
| Heart rate                                                                                                                                               | 23583979 | haematologica  | European & Indian Asian | -0.0541 | 0.0911 | 0.5528 |
| Work/job satisfaction - unhappy                                                                                                                          | 0        | ukbb           | European                | 0.0723  | 0.1223 | 0.5545 |
| Diagnoses - main ICD10: C44 Other malignant neoplasms of skin                                                                                            | 0        | ukbb           | European                | 0.0654  | 0.1109 | 0.5556 |
| Diagnoses - main ICD10: M72 Fibroblastic disorders                                                                                                       | 0        | ukbb           | European                | -0.0658 | 0.112  | 0.557  |
| Heel bone mineral density (BMD) T-score_automated (right)                                                                                                | 0        | ukbb           | European                | -0.0324 | 0.0553 | 0.5575 |
| Non-cancer illness code_ self-reported: pneumothorax                                                                                                     | 0        | ukbb           | European                | 0.105   | 0.1793 | 0.558  |
| Medication for cholesterol_ blood pressure or diabetes: Cholesterol lowering medication                                                                  | 0        | ukbb           | European                | 0.0457  | 0.0782 | 0.5591 |
| Triglycerides in chylomicrons and largest VLDL particles                                                                                                 | 27005778 | metabolites    | European                | -0.0803 | 0.1395 | 0.5646 |
| Impedance of arm (left)                                                                                                                                  | 0        | ukbb           | European                | -0.0244 | 0.0425 | 0.5661 |
| Used an inhaler for chest within last hour                                                                                                               | 0        | ukbb           | European                | 0.1036  | 0.1816 | 0.5685 |
| Friendships satisfaction -unhappy                                                                                                                        | 0        | ukbb           | European                | -0.0484 | 0.0855 | 0.5715 |
| Eye problems/disorders: Glaucoma                                                                                                                         | 0        | ukbb           | European                | -0.067  | 0.1187 | 0.5723 |
| Fasting insulin main effect                                                                                                                              | 22581228 | glycemic       | European                | 0.0526  | 0.0933 | 0.5732 |
| Medication for cholesterol_ blood pressure or diabetes: Insulin                                                                                          | 0        | ukbb           | European                | 0.1217  | 0.2171 | 0.5751 |
| Autism spectrum disorder                                                                                                                                 | 28540026 | psychiatric    | European                | -0.0598 | 0.1075 | 0.578  |
| Birth weight                                                                                                                                             | 27680694 | anthropometric | European                | 0.036   | 0.065  | 0.5796 |
| Ferritin                                                                                                                                                 | 25352340 | metal          | European                | -0.0755 | 0.1363 | 0.5796 |
| Reason for glasses/contact lenses: For long-sightedness_ i.e. for distance and near_ but particularly for near tasks like reading (called hypermetropia) | 0        | ukbb           | European                | -0.0732 | 0.1333 | 0.5828 |
| Fasting glucose main effect                                                                                                                              | 22581228 | glycemic       | European                | 0.0445  | 0.0816 | 0.5857 |
| Doctor diagnosed asthma                                                                                                                                  | 0        | ukbb           | European                | -0.0461 | 0.0846 | 0.5857 |
| Valine                                                                                                                                                   | 27005778 | metabolites    | European                | -0.0923 | 0.1697 | 0.5866 |
| Vitamin and mineral supplements: None of the above                                                                                                       | 0        | ukbb           | European                | -0.0401 | 0.074  | 0.5877 |
| Medication for cholesterol_ blood pressure or diabetes: Blood pressure medication                                                                        | 0        | ukbb           | European                | 0.0352  | 0.0651 | 0.5888 |
| Cancer code_ self-reported: breast cancer                                                                                                                | 0        | ukbb           | European                | 0.0616  | 0.114  | 0.5889 |
| Illnesses of mother: None of the above (group 1)                                                                                                         | 0        | ukbb           | European                | -0.0543 | 0.101  | 0.5905 |
| Average weekly intake of other alcoholic drinks                                                                                                          | 0        | ukbb           | European                | 0.1176  | 0.2205 | 0.594  |
| Multiple sclerosis                                                                                                                                       | 21833088 | autoimmune     | European                | 0.0951  | 0.1826 | 0.6027 |
| Diagnoses - main ICD10: S76 Injury of muscle and tendon at hip and thigh level                                                                           | 0        | ukbb           | European                | -0.1527 | 0.2963 | 0.6064 |
| Non-cancer illness code_ self-reported: diabetes                                                                                                         | 0        | ukbb           | European                | -0.04   | 0.0779 | 0.607  |
| Ratio of bisallylic groups to total fatty acids                                                                                                          | 27005778 | metabolites    | European                | 0.0506  | 0.0986 | 0.6076 |
| Hearing difficulty/problems with background noise                                                                                                        | 0        | ukbb           | European                | 0.033   | 0.0649 | 0.6112 |
| Heel bone mineral density (BMD) T-score_automated                                                                                                        | 0        | ukbb           | European                | -0.0229 | 0.0451 | 0.6114 |
| Extreme waist-to-hip ratio                                                                                                                               | 23563607 | anthropometric | European                | 0.0648  | 0.1301 | 0.6187 |
| Diagnoses - main ICD10: K60 Fissure and fistula of anal and rectal regions                                                                               | 0        | ukbb           | European                | -0.0729 | 0.1471 | 0.6201 |
| Mean time to correctly identify matches                                                                                                                  | 0        | ukbb           | European                | 0.0284  | 0.0581 | 0.6251 |
| Non-cancer illness code_ self-reported: vitiligo                                                                                                         | 0        | ukbb           | European                | 0.1898  | 0.3938 | 0.6297 |
| Concentration of large VLDL particles                                                                                                                    | 27005778 | metabolites    | European                | -0.0591 | 0.1237 | 0.6327 |
| Diagnoses - main ICD10: N40 Hyperplasia of prostate                                                                                                      | 0        | ukbb           | European                | -0.0665 | 0.1395 | 0.6335 |
| Diagnoses - main ICD10: J44 Other chronic obstructive pulmonary disease                                                                                  | 0        | ukbb           | European                | 0.0884  | 0.1854 | 0.6336 |

|                                                                                        |          |                |          |         |        |        |
|----------------------------------------------------------------------------------------|----------|----------------|----------|---------|--------|--------|
| Fractured bone site(s): Wrist                                                          | 0        | ukbb           | European | 0.0746  | 0.1578 | 0.6364 |
| Number of older siblings                                                               | 0        | ukbb           | European | 0.5854  | 1.2456 | 0.6384 |
| Diagnoses - main ICD10: N19 Unspecified renal failure                                  | 0        | ukbb           | European | -0.109  | 0.2321 | 0.6387 |
| Triglycerides in medium VLDL                                                           | 27005778 | metabolites    | European | -0.0672 | 0.1441 | 0.641  |
| Mouth/teeth dental problems: Mouth ulcers                                              | 0        | ukbb           | European | 0.0421  | 0.0907 | 0.6424 |
| Illnesses of father: Prostate cancer                                                   | 0        | ukbb           | European | 0.0622  | 0.1351 | 0.6451 |
| Height_2010                                                                            | 20881960 | anthropometric | European | 0.0211  | 0.0461 | 0.647  |
| Concentration of very large VLDL particles                                             | 27005778 | metabolites    | European | -0.0592 | 0.1302 | 0.6492 |
| Vitamin and mineral supplements: Vitamin D                                             | 0        | ukbb           | European | -0.0629 | 0.1403 | 0.6541 |
| Average weekly champagne plus white wine intake                                        | 0        | ukbb           | European | -0.0363 | 0.0824 | 0.6596 |
| Diagnoses - main ICD10: M21 Other acquired deformities of limbs                        | 0        | ukbb           | European | 0.2297  | 0.5233 | 0.6607 |
| Child birth length                                                                     | 25281659 | anthropometric | European | -0.0427 | 0.0981 | 0.6631 |
| Ratio of bisallylic groups to double bonds                                             | 27005778 | metabolites    | European | 0.0405  | 0.0936 | 0.6651 |
| Non-cancer illness code_ self-reported: uterine fibroids                               | 0        | ukbb           | European | 0.0565  | 0.1314 | 0.6671 |
| Triglycerides in large VLDL                                                            | 27005778 | metabolites    | European | -0.0559 | 0.1309 | 0.6694 |
| Illnesses of mother: High blood pressure                                               | 0        | ukbb           | European | 0.0349  | 0.0818 | 0.67   |
| Medication for cholesterol_ blood pressure or diabetes: None of the above              | 0        | ukbb           | European | -0.0306 | 0.0725 | 0.6733 |
| Diagnoses - main ICD10: N20 Calculus of kidney and ureter                              | 0        | ukbb           | European | 0.047   | 0.1135 | 0.6788 |
| Hip circumference                                                                      | 25673412 | anthropometric | European | -0.0198 | 0.0481 | 0.6799 |
| Total Cholesterol                                                                      | 20686565 | lipids         | European | 0.0303  | 0.074  | 0.6824 |
| Urinary albumin-to-creatinine ratio                                                    | 26631737 | kidney         | European | 0.0464  | 0.1141 | 0.684  |
| Diagnoses - main ICD10: G47 Sleep disorders                                            | 0        | ukbb           | European | 0.0671  | 0.1649 | 0.684  |
| Comparative height size at age 10                                                      | 0        | ukbb           | European | 0.0183  | 0.0456 | 0.6883 |
| Phospholipids in medium LDL                                                            | 27005778 | metabolites    | European | -0.0723 | 0.181  | 0.6897 |
| Mineral and other dietary supplements: Fish oil (including cod liver oil)              | 0        | ukbb           | European | -0.0322 | 0.0819 | 0.6941 |
| Leucine                                                                                | 27005778 | metabolites    | European | -0.0833 | 0.2122 | 0.6946 |
| Diagnoses - main ICD10: M70 Soft tissue disorders related to use_ overuse and pressure | 0        | ukbb           | European | 0.0768  | 0.1983 | 0.6984 |
| Maximum heart rate during fitness test                                                 | 0        | ukbb           | European | -0.0515 | 0.1344 | 0.7018 |
| Extreme height                                                                         | 23563607 | anthropometric | European | 0.0267  | 0.07   | 0.7029 |
| Non-cancer illness code_ self-reported: kidney stone/ureter stone/bladder stone        | 0        | ukbb           | European | -0.0426 | 0.1123 | 0.7044 |
| Non-cancer illness code_ self-reported: malabsorption/coeliac disease                  | 0        | ukbb           | European | 0.0479  | 0.1269 | 0.7057 |
| Average number of double bonds in a fatty acid chain                                   | 27005778 | metabolites    | European | 0.041   | 0.1108 | 0.7118 |
| Diagnoses - main ICD10: M25 Other joint disorders_ not elsewhere classified            | 0        | ukbb           | European | 0.2542  | 0.6958 | 0.7148 |
| Potassium in urine                                                                     | 0        | ukbb           | European | 0.024   | 0.0662 | 0.7165 |
| Mean Caudate                                                                           | 25607358 | brain_volume   | European | 0.0403  | 0.1132 | 0.7215 |
| Started insulin within one year diagnosis of diabetes                                  | 0        | ukbb           | European | 0.0449  | 0.1266 | 0.7227 |
| HOMA-B                                                                                 | 20081858 | glycemic       | European | -0.0373 | 0.1057 | 0.7242 |
| Forced expiratory volume in 1-second (FEV1)_ predicted                                 | 0        | ukbb           | European | -0.0201 | 0.0577 | 0.7276 |
| 2hr glucose adjusted for BMI                                                           | 20081857 | glycemic       | European | -0.0615 | 0.1782 | 0.73   |
| Diabetes diagnosed by doctor                                                           | 0        | ukbb           | European | -0.0247 | 0.0728 | 0.7348 |
| Non-accidental death in close genetic family                                           | 0        | ukbb           | European | -0.0431 | 0.1304 | 0.7413 |
| Overweight                                                                             | 23563607 | anthropometric | European | 0.0183  | 0.0556 | 0.7415 |
| Diagnoses - main ICD10: H25 Senile cataract                                            | 0        | ukbb           | European | -0.0692 | 0.2177 | 0.7505 |
| Non-cancer illness code_ self-reported: arthritis (nos)                                | 0        | ukbb           | European | 0.0838  | 0.2695 | 0.756  |
| Non-cancer illness code_ self-reported:                                                | 0        | ukbb           | European | -0.1376 | 0.4458 | 0.7576 |

|                                                                                                                  |          |                |                                                      |         |        |        |
|------------------------------------------------------------------------------------------------------------------|----------|----------------|------------------------------------------------------|---------|--------|--------|
| allergy or anaphylactic reaction to drug                                                                         |          |                |                                                      |         |        |        |
| 22:6 docosahexaenoic acid                                                                                        | 27005778 | metabolites    | European                                             | -0.0442 | 0.1457 | 0.7617 |
| Non-cancer illness code_ self-reported: pernicious anaemia                                                       | 0        | ukbb           | European                                             | 0.0619  | 0.2043 | 0.7619 |
| Snoring                                                                                                          | 0        | ukbb           | European                                             | 0.0182  | 0.0624 | 0.77   |
| Impedance of arm (right)                                                                                         | 0        | ukbb           | European                                             | -0.0121 | 0.0422 | 0.7737 |
| Obsessive-compulsive disorder                                                                                    | 28761083 | psychiatric    | European                                             | 0.0284  | 0.0996 | 0.7753 |
| Diagnoses - main ICD10: G56 Mononeuropathies of upper limb                                                       | 0        | ukbb           | European                                             | 0.0301  | 0.1079 | 0.7807 |
| Cancer code_ self-reported: prostate cancer                                                                      | 0        | ukbb           | European                                             | 0.0408  | 0.148  | 0.7828 |
| Worry too long after embarrassment                                                                               | 0        | ukbb           | European                                             | -0.0173 | 0.0632 | 0.7837 |
| Height; Females at age 10 and males at age 12                                                                    | 23449627 | anthropometric | European                                             | 0.022   | 0.0846 | 0.7947 |
| Weight                                                                                                           | 0        | ukbb           | European                                             | 0.0106  | 0.041  | 0.7954 |
| Mean Putamen                                                                                                     | 25607358 | brain_volume   | European                                             | 0.0263  | 0.1035 | 0.7993 |
| Frequency of heavy DIY in last 4 weeks                                                                           | 0        | ukbb           | European                                             | 0.0316  | 0.1295 | 0.8072 |
| Acetate                                                                                                          | 27005778 | metabolites    | European                                             | 0.045   | 0.1902 | 0.8131 |
| Non-cancer illness code_ self-reported: hypopituitarism                                                          | 0        | ukbb           | European                                             | 0.0825  | 0.3497 | 0.8136 |
| Handedness (chirality/laterality): Use both right and left hands equally                                         | 0        | ukbb           | European                                             | -0.0457 | 0.1945 | 0.8141 |
| Obesity class 3                                                                                                  | 23563607 | anthropometric | European                                             | 0.0214  | 0.092  | 0.8163 |
| Maximum workload during fitness test                                                                             | 0        | ukbb           | European                                             | -0.032  | 0.1424 | 0.8221 |
| Arm fat mass (left)                                                                                              | 0        | ukbb           | European                                             | 0.0088  | 0.0395 | 0.8245 |
| Alanine                                                                                                          | 27005778 | metabolites    | European                                             | 0.0296  | 0.1356 | 0.8274 |
| Vitamin and mineral supplements: Vitamin C                                                                       | 0        | ukbb           | European                                             | 0.0209  | 0.1008 | 0.8354 |
| Non-cancer illness code_ self-reported: cholelithiasis/gall stones                                               | 0        | ukbb           | European                                             | 0.0276  | 0.1366 | 0.8401 |
| Total lipids in small HDL                                                                                        | 27005778 | metabolites    | European                                             | 0.037   | 0.1834 | 0.8403 |
| Blood clot_ DVT_ bronchitis_ emphysema_ asthma_ rhinitis_ eczema_ allergy diagnosed by doctor: None of the above | 0        | ukbb           | European                                             | -0.0107 | 0.0532 | 0.8412 |
| Mineral and other dietary supplements: Zinc                                                                      | 0        | ukbb           | European                                             | 0.0231  | 0.116  | 0.8423 |
| Non-cancer illness code_ self-reported: hayfever/allergic rhinitis                                               | 0        | ukbb           | European                                             | -0.0171 | 0.0874 | 0.845  |
| Diagnoses - main ICD10: S52 Fracture of forearm                                                                  | 0        | ukbb           | European                                             | 0.0254  | 0.1342 | 0.8499 |
| Sleep duration                                                                                                   | 27494321 | sleeping       | European                                             | -0.0142 | 0.0756 | 0.8509 |
| Non-cancer illness code_ self-reported: glaucoma                                                                 | 0        | ukbb           | European                                             | 0.0221  | 0.1181 | 0.8515 |
| Arm fat mass (right)                                                                                             | 0        | ukbb           | European                                             | 0.0072  | 0.039  | 0.8543 |
| Arm fat percentage (left)                                                                                        | 0        | ukbb           | European                                             | -0.0071 | 0.0394 | 0.8568 |
| Trunk predicted mass                                                                                             | 0        | ukbb           | European                                             | 0.0081  | 0.0448 | 0.8569 |
| Had major operations                                                                                             | 0        | ukbb           | European                                             | 0.0205  | 0.1157 | 0.8592 |
| Sitting height                                                                                                   | 0        | ukbb           | European                                             | -0.0077 | 0.0437 | 0.8599 |
| Childhood obesity                                                                                                | 22484627 | anthropometric | European                                             | 0.014   | 0.0798 | 0.8612 |
| Glucose                                                                                                          | 27005778 | metabolites    | European                                             | 0.0233  | 0.1398 | 0.8676 |
| Vitamin and mineral supplements: Vitamin E                                                                       | 0        | ukbb           | European                                             | 0.0222  | 0.139  | 0.8729 |
| Relative age of first facial hair                                                                                | 0        | ukbb           | European                                             | -0.0086 | 0.0576 | 0.8818 |
| Body fat                                                                                                         | 26833246 | anthropometric | European, South Asian, East Asian & African American | 0.0108  | 0.0739 | 0.8835 |
| LDL cholesterol                                                                                                  | 20686565 | lipids         | European                                             | -0.0123 | 0.0844 | 0.8843 |
| Average number of methylene groups per a double bond                                                             | 27005778 | metabolites    | European                                             | -0.0155 | 0.1074 | 0.8851 |
| Medication for cholesterol_ blood pressure_ diabetes_ or take exogenous hormones: Blood pressure medication      | 0        | ukbb           | European                                             | 0.0087  | 0.0624 | 0.8884 |
| Diagnoses - main ICD10: M23 Internal derangement of knee                                                         | 0        | ukbb           | European                                             | -0.0178 | 0.1318 | 0.8925 |
| Non-cancer illness code_ self-reported: osteoporosis                                                             | 0        | ukbb           | European                                             | 0.0122  | 0.1018 | 0.9045 |

|                                                                                                  |          |                     |                                             |         |        |        |
|--------------------------------------------------------------------------------------------------|----------|---------------------|---------------------------------------------|---------|--------|--------|
| Non-cancer illness code_ self-reported: back problem                                             | 0        | ukbb                | European                                    | -0.0183 | 0.1565 | 0.9069 |
| Trunk fat-free mass                                                                              | 0        | ukbb                | European                                    | 0.005   | 0.0446 | 0.9106 |
| Non-cancer illness code_ self-reported: bladder problem (not cancer)                             | 0        | ukbb                | European                                    | 0.0247  | 0.2232 | 0.9118 |
| Excessive daytime sleepiness                                                                     | 27992416 | sleeping            | European                                    | -0.0097 | 0.0906 | 0.9144 |
| Diagnoses - main ICD10: M24 Other specific joint derangements                                    | 0        | ukbb                | European                                    | 0.0198  | 0.1923 | 0.9178 |
| Number of trend entries                                                                          | 0        | ukbb                | European                                    | -0.0164 | 0.1646 | 0.9205 |
| Non-cancer illness code_ self-reported: ankylosing spondylitis                                   | 0        | ukbb                | European                                    | 0.0208  | 0.2106 | 0.9214 |
| Diagnoses - main ICD10: J34 Other disorders of nose and nasal sinuses                            | 0        | ukbb                | European                                    | 0.0195  | 0.2044 | 0.9242 |
| Whole body fat-free mass                                                                         | 0        | ukbb                | European                                    | -0.0041 | 0.0444 | 0.9257 |
| Adiponectin                                                                                      | 22479202 | cardiometabol<br>ic | European,<br>African<br>American<br>& Asian | -0.0102 | 0.1121 | 0.9273 |
| Triglycerides in very large HDL                                                                  | 27005778 | metabolites         | European                                    | 0.012   | 0.135  | 0.9291 |
| Illnesses of siblings: Severe depression                                                         | 0        | ukbb                | European                                    | 0.0093  | 0.1112 | 0.9335 |
| HOMA-IR                                                                                          | 20081858 | glycemic            | European                                    | 0.0097  | 0.1214 | 0.9362 |
| Arm fat percentage (right)                                                                       | 0        | ukbb                | European                                    | -0.003  | 0.0393 | 0.9399 |
| Length of menstrual cycle                                                                        | 0        | ukbb                | European                                    | -0.0092 | 0.1248 | 0.9413 |
| Acetoacetate                                                                                     | 27005778 | metabolites         | European                                    | -0.0112 | 0.1528 | 0.9414 |
| Whole body water mass                                                                            | 0        | ukbb                | European                                    | -0.0032 | 0.0441 | 0.942  |
| Illnesses of mother: Diabetes                                                                    | 0        | ukbb                | European                                    | 0.0064  | 0.0907 | 0.9434 |
| Body mass index                                                                                  | 20935630 | anthropometri<br>c  | European                                    | -0.0033 | 0.0499 | 0.9474 |
| Diagnoses - main ICD10: I21 Acute myocardial infarction                                          | 0        | ukbb                | European                                    | 0.0073  | 0.1192 | 0.9513 |
| Non-cancer illness code_ self-reported: polio / poliomyelitis                                    | 0        | ukbb                | European                                    | 0.0109  | 0.1912 | 0.9547 |
| Duration of other exercises                                                                      | 0        | ukbb                | European                                    | 0.0064  | 0.1193 | 0.9574 |
| Chronotype                                                                                       | 27494321 | sleeping            | European                                    | 0.0028  | 0.0628 | 0.964  |
| Diagnoses - main ICD10: O75 Other complications of labour and delivery_ not elsewhere classified | 0        | ukbb                | European                                    | 0.0108  | 0.2388 | 0.9641 |
| Non-cancer illness code_ self-reported: rheumatoid arthritis                                     | 0        | ukbb                | European                                    | -0.0062 | 0.1389 | 0.9643 |
| Hair/balding pattern: Pattern 4                                                                  | 0        | ukbb                | European                                    | 0.0026  | 0.0588 | 0.9648 |
| Creatinine                                                                                       | 27005778 | metabolites         | European                                    | -0.0045 | 0.1084 | 0.967  |
| Hair/balding pattern: Pattern 3                                                                  | 0        | ukbb                | European                                    | -0.0031 | 0.0838 | 0.9708 |
| Illnesses of siblings: Stroke                                                                    | 0        | ukbb                | European                                    | -0.0065 | 0.1915 | 0.973  |
| Non-cancer illness code_ self-reported: vaginal prolapse/uterine prolapse                        | 0        | ukbb                | European                                    | 0.0052  | 0.1663 | 0.9749 |
| Hearing aid user                                                                                 | 0        | ukbb                | European                                    | -0.0026 | 0.1221 | 0.983  |
| Non-cancer illness code_ self-reported: eczema/dermatitis                                        | 0        | ukbb                | European                                    | 0.0025  | 0.1266 | 0.9841 |
| Basal metabolic rate                                                                             | 0        | ukbb                | European                                    | -0.0008 | 0.0436 | 0.9849 |
| Type 2 Diabetes                                                                                  | 22885922 | glycemic            | European                                    | -0.0014 | 0.082  | 0.9865 |
| Idiopathic pulmonary fibrosis                                                                    | 29066090 | lung_function       | European                                    | 0.0032  | 0.2891 | 0.991  |
| Obesity class 1                                                                                  | 23563607 | anthropometri<br>c  | European                                    | 0.0005  | 0.0492 | 0.9911 |
| Non-cancer illness code_ self-reported: hypertrophic cardiomyopathy (hcm / hocm)                 | 0        | ukbb                | European                                    | 0.0022  | 0.3409 | 0.9949 |
